# Supplementary material for: Gastric vagal afferent signaling to the basolateral amygdala mediates anxiety-like behaviors in experimental colitis mice
Source: PubMed Central journal article supplement (PMC10371239; doi:10.1172/jci.insight.161874), 2023-06-22
Supplement: jciinsight-8-161874-s093.pdf [file jciinsight-8-161874-s093.pdf]

**SUPPLEMENTARY MATERIALS**

**Gastric vagal afferent signaling to the basolateral amygdala mediates anxiety-like behaviors in experimental colitis mice**

**Chin-Hao Chen,<sup>1</sup> Tsung-Chih Tsai,<sup>1</sup> Yi-Jen Wu,<sup>2,3</sup> and Kuei-Sen Hsu<sup>1,4,\*</sup>**

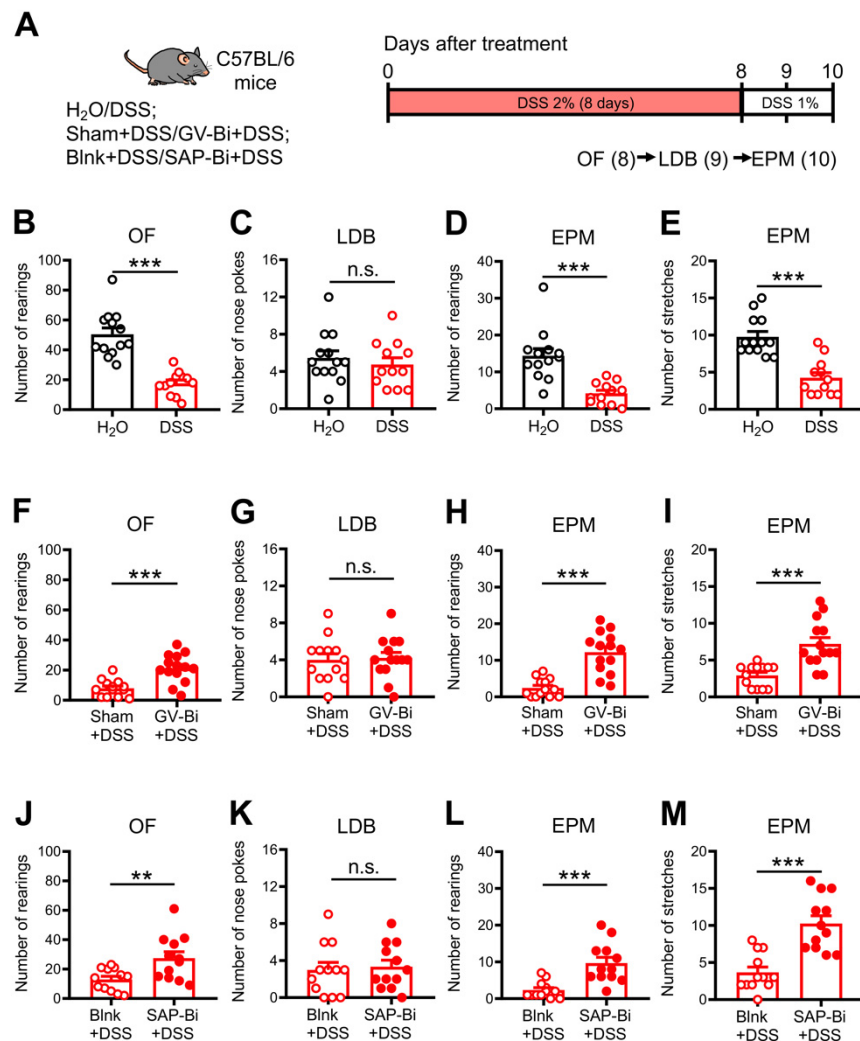

**Supplemental Figure 1. Gastric vagotomy and targeted ablation of vagal afferent neurons by CCK-SAP injections rescue anxiety-related risk assessment behavioral deficits in DSS-induced colitis mice.** (A) Schematic illustration of the experimental timeline. Wild type, Sham, Bilateral gastric vagotomy (GV-Bi), SAP-Blank (Blnk) and CCK-SAP (SAP-Bi) mice received 2% DSS in drinking water for 8 days followed by a maintenance dose of 1% for two days. All groups were subjected to behavioral tests on D9 and D10. (B-E) Comparing the effect of H<sub>2</sub>O and DSS treatment on the number of rearing in the open field (OF) test (B), the number of nose pokes in the light dark box (LDB) test (C) and the number of rearing and number of stretches in the elevated plus maze (EPM) test (D and E) (H<sub>2</sub>O: n = 13, DSS: n = 12). (F-I) Comparing the effect of sham + DSS and GV-Bi + DSS on the number of rearing in the OF test (F), the number of nose pokes in LDB test (G) and the number of rearing and number of stretches in the EPM test (H and I) (sham-DSS: n = 13, GV-Bi-DSS: n = 14). (J-M) Comparing the effect of Blnk + DSS and SAP-Bi + DSS on the number of rearing in the OF test (J), the number of nose pokes in the LDB test (K) and the number of rearing and number of stretches in the EPM test (L and M) (n = 12 in each group). Data represent the mean ± SEM. \*\*  $P < 0.01$ , \*\*\*  $P < 0.001$  and n.s., not significant by two-tailed Student's  $t$ -test and Mann-Whitney  $U$  test (D).

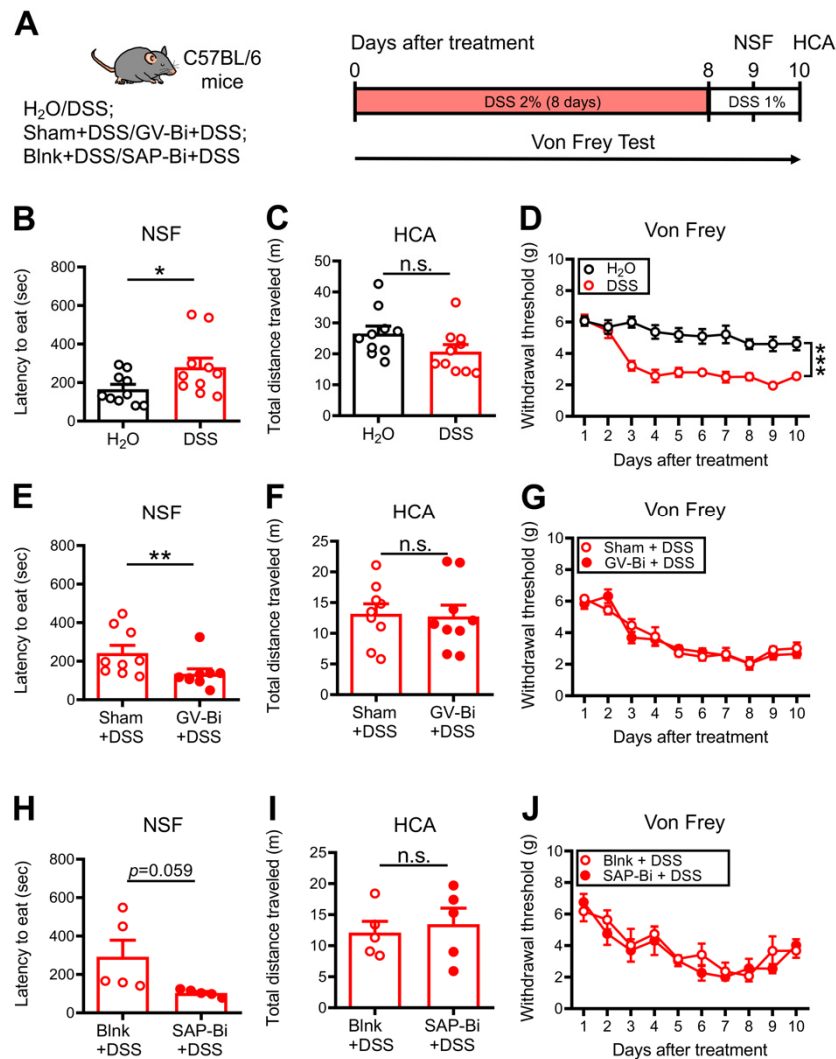

**Supplemental Figure 2. Gastric vagotomy and targeted ablation of vagal afferent neurons by CCK-SAP injection reduce anxiety level of DSS-induced colitis mice without affecting pain sensitivity and locomotor activity.** (A) Schematic illustration of the experimental timeline. Wild type, Sham, Bilateral gastric vagotomy (GV-Bi), SAP-Blank (Blnk) and CCK-SAP (SAP-Bi) mice received 2% DSS in drinking water for 8 days followed by a maintenance dose of 1% for two days. All groups were subjected to behavioral tests on D9 and D10. (B-D) Comparing the effect of H<sub>2</sub>O and DSS treatment on (B) novelty suppressed food intake (NSF) test, (C) home cage activity test (HCA) and (D) von Frey test (n = 10 in each group). (E-G) Comparing the effect of sham + DSS and GV-Bi + DSS on (E) novelty suppressed food intake (NSF) test, (F) home cage activity test (HCA) and (G) von Frey test (n = 9 in each group). (H-J) Comparing the effect of Blnk + DSS and SAP-Bi + DSS on (H) novelty suppressed food intake (NSF) test, (I) home cage activity test (HCA) and (J) von Frey test (n = 5 in each group). Data represent the mean  $\pm$  SEM. \*  $P < 0.05$ , \*\*  $P < 0.01$ , \*\*\*  $P < 0.001$  and n.s., not significant by two-way RM ANOVA (D, G, J), two-tailed Student's *t*-test (B, C, E, H, I) and Mann-Whitney *U* test (F).

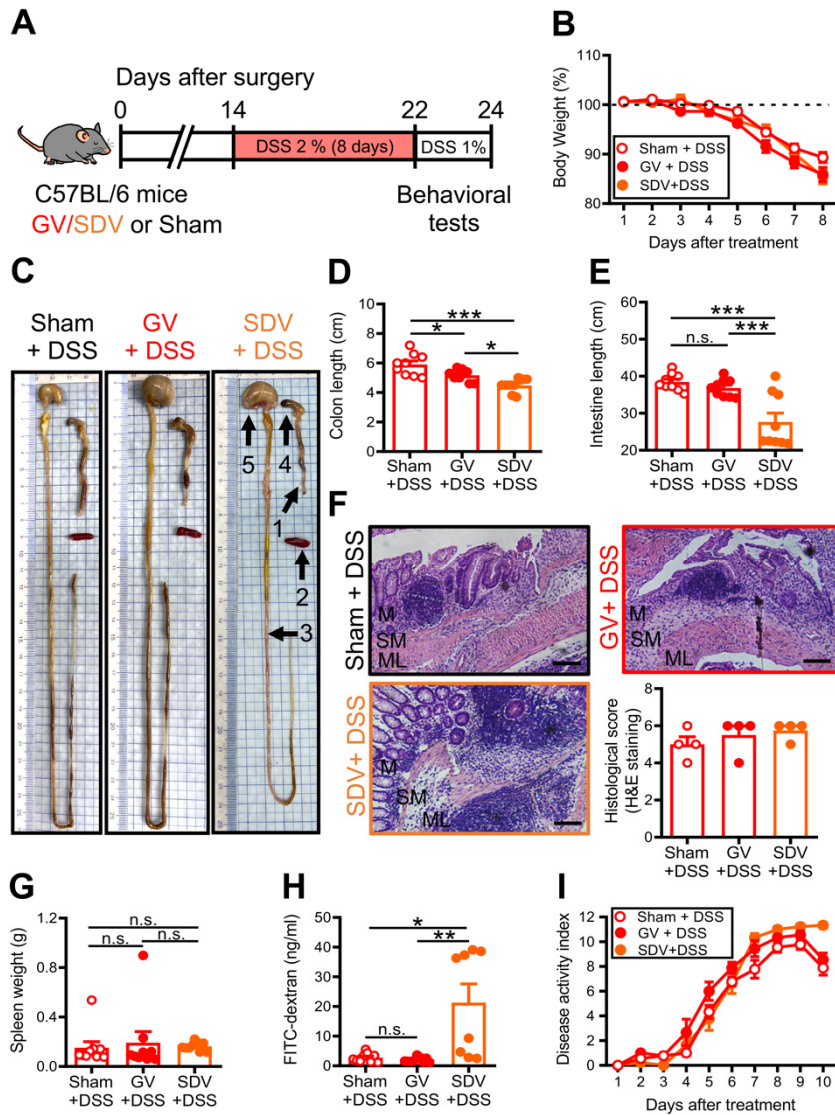

**Supplemental Figure 3. The effect of gastric and subdiaphragmatic vagotomy on DSS-induced colitis phenotypes.** (A) Schematic of the experimental timeline. Two weeks after surgery, mice received 2% DSS in drinking water for 8 days followed by 1% for two days. All groups were subjected to behavioral tests on D22, D23 and D24 before sacrifice. (B) Body weights recorded during the experimental period (sham-DSS: n = 9, GV-DSS: n = 9, SDV-DSS: n=9). (C) Gross morphology images of sham-DSS, GV-DSS and SDV-DSS group. Arrows indicate: (1) colon; (2) spleen; (3) small intestine; (4) cecum; and (5) stomach. (D, E, G) Quantification of (D) colon length; (E) small intestine length and (G) spleen weight on D25 in sham-DSS, GV-DSS and SDV-DSS groups (n = 9 in each group). (F) H&E staining and histological score of colonic sections were assessed on D25 in sham-DSS, GV-DSS and SDV-DSS groups (n = 4 in each group). M: mucosa layer, SM: submucosa layer, and ML: muscular layer. Scale bar, 200  $\mu$ m. (H) Quantification of FITC-dextran permeability on D25 in sham-DSS, GV-DSS and SDV-DSS groups (n = 9 in each group). (I) DAI score was used to evaluate the severity of DSS-induced colitis recorded from D14 to D24 (n = 9 in each group). DAI score was calculated total score (body weight + stool consistency + rectal bleeding). Data represent the mean  $\pm$  SEM. \*  $P < 0.05$ , \*\*  $P < 0.01$ , \*\*\*  $P < 0.001$  and n.s., not significant by one-way ANOVA with Tukey's multiple comparison test (D, E) and Kruskal-Wallis test with Tukey's multiple comparison test (H).

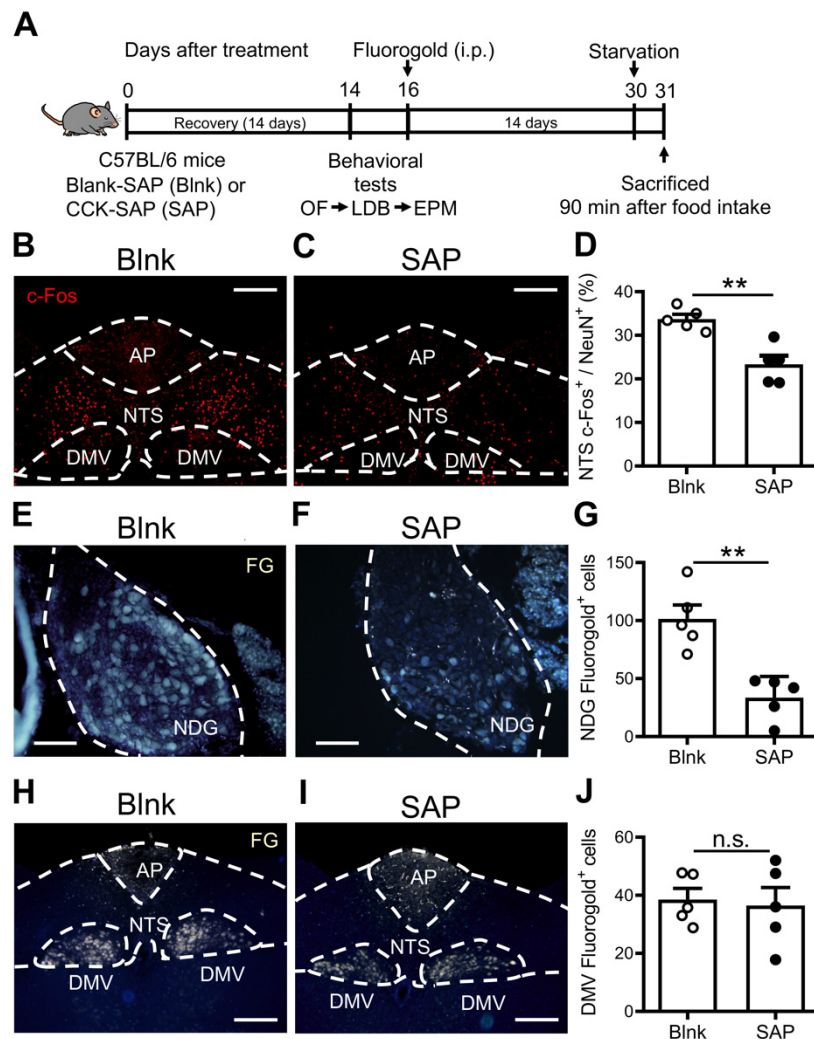

**Supplemental Figure 4. Targeted ablation of vagal afferent neurons by CCK-SAP injection.** (A) Schematic illustration of the experimental timeline. Sixteen days after mice received nodal injection of Blank-SAP (Blnk) or CCK-SAP (SAP), Fluorogold (FG, 10 mg/kg) was injected intraperitoneally (i.p.) after behavioral tests. Two weeks after FG injection, mice were sacrificed 90 min after food intake. Mice were food deprived for 20 h prior to food intake. (B) and (C) Representative images and (D) quantitative analysis of c-Fos-labeled cells in Blnk and SAP mice 90 min after food intake within the nucleus tractus solitarius (NTS,  $n = 5$  in each group). Scale bar, 200  $\mu\text{m}$ . (E) and (F) Representative images and (G) quantitative analysis of FG-labeled cells in nodose ganglia (NDG) 15 days after intraperitoneal injection of FG ( $n = 5$  in each group). Scale bar, 100  $\mu\text{m}$ . (H) and (I) Representative images and (J) quantitative analysis of FG-labeled cells in dorsal motor nucleus of the vagus (DMV) 15 days after intraperitoneal injection of FG (DMV,  $n = 5$  in each group). Scale bar, 200  $\mu\text{m}$ . Data represent the mean  $\pm$  SEM. \*\* $P < 0.01$  and n.s., not significant by two-tailed Student's  $t$ -test.



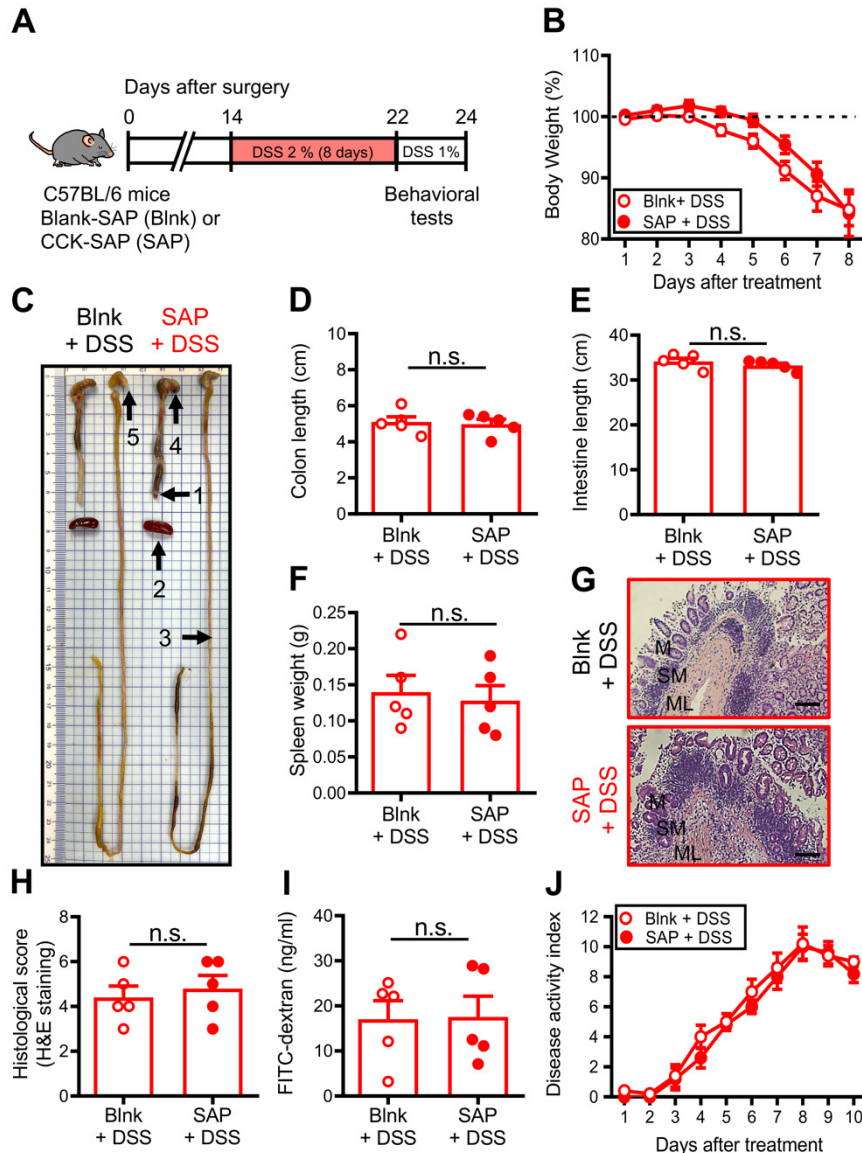

**Supplemental Figure 5. The effect of CCK-SAP nodose injection on DSS-induced colitis phenotypes.** (A) Schematic of the experimental timeline. Two weeks after surgery, mice received 2% DSS in drinking water for 8 days followed by a maintenance dose of 1% for two days. All groups were subjected to behavioral tests on D22, D23 and D24 before sacrifice. (B) Body weights recorded during the experimental period of Blank-SAP + DSS (Blnk + DSS) and CCK-SAP + DSS mice (SAP + DSS) (Blnk + DSS: n = 5, SAP + DSS: n = 5). (C) Gross morphology images of Blnk + DSS and SAP + DSS groups. Arrows indicate: (1) colon; (2) spleen; (3) small intestine; (4) cecum; and (5) stomach. (D-F) Quantification of (D) colon length; (E) small intestine length and (F) spleen weight on D25 in Blnk + DSS and SAP + DSS groups (n = 5 in each group). (G) H&E staining and (H) histological score of colonic sections were assessed on D25 in Blnk + DSS and SAP + DSS groups (n = 5 in each group). M: mucosa layer, SM: submucosa layer, and ML: muscular layer. Scale bar, 200  $\mu$ m. (I) Quantification of FITC-dextran permeability on D25 in Blnk + DSS and SAP + DSS groups (n = 5 in each group). (J) DAI score was used to evaluate the severity of DSS-induced colitis recorded from D14 to D24 (n = 5 in each group). DAI score was calculated total score (body weight + stool consistency + rectal bleeding). Data represent the mean  $\pm$  SEM. n.s., not significant by two-tailed unpaired Student's *t*-test (D, E, F, H, I).

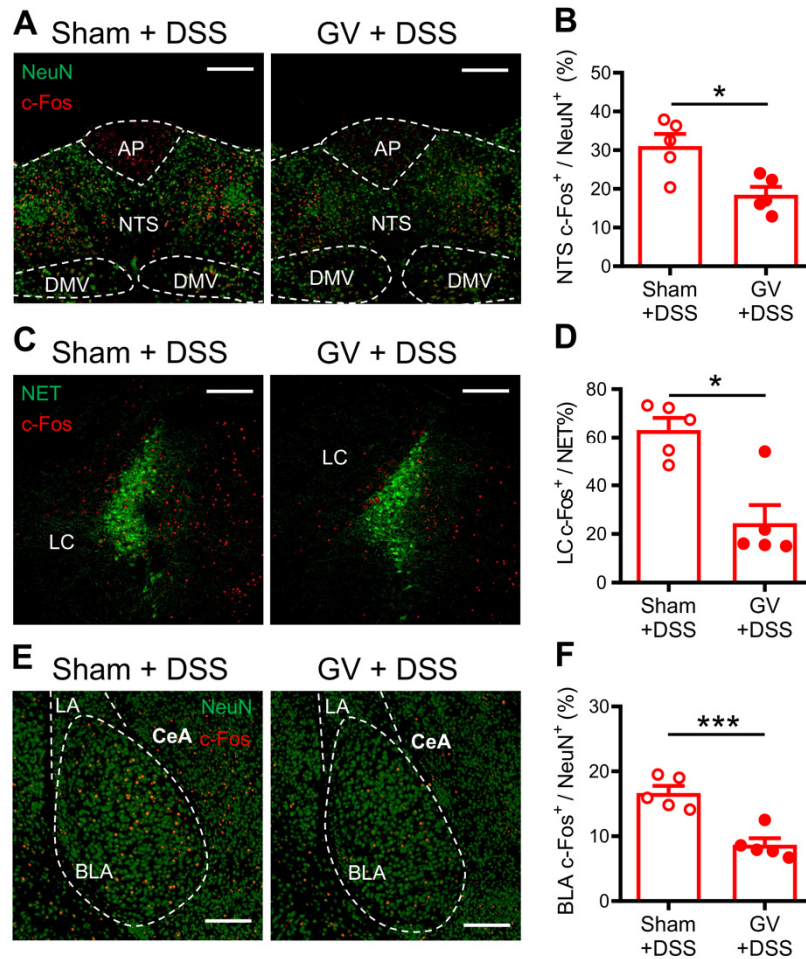

**Supplemental Figure 6. Gastric vagotomy reduces c-Fos expression in multiple brain regions after the elevated plus maze test in DSS-induced colitis mice.** Representative images and quantitative analysis of c-Fos-labeled cells in Sham + DSS and GV + DSS mice 90 min after the EPM test within the nucleus tractus solitarius (NTS,  $n = 5$  in each group) (**A and B**), locus coeruleus (LC,  $n = 5$  in each group) (**C and D**) and basolateral amygdala (BLA,  $n = 5$  in each group) (**E and F**). Scale bar, 200  $\mu\text{m}$ . AP, area postrema; DMV, dorsal motor nucleus of the vagus; LA, lateral amygdala; CeA, central nucleus of the amygdala. Data represent the mean  $\pm$  SEM. \* $P < 0.05$  and \*\*\* $P < 0.001$  by two-tailed unpaired Student's  $t$ -test (**B and F**), Mann-Whitney  $U$  test (**D**).

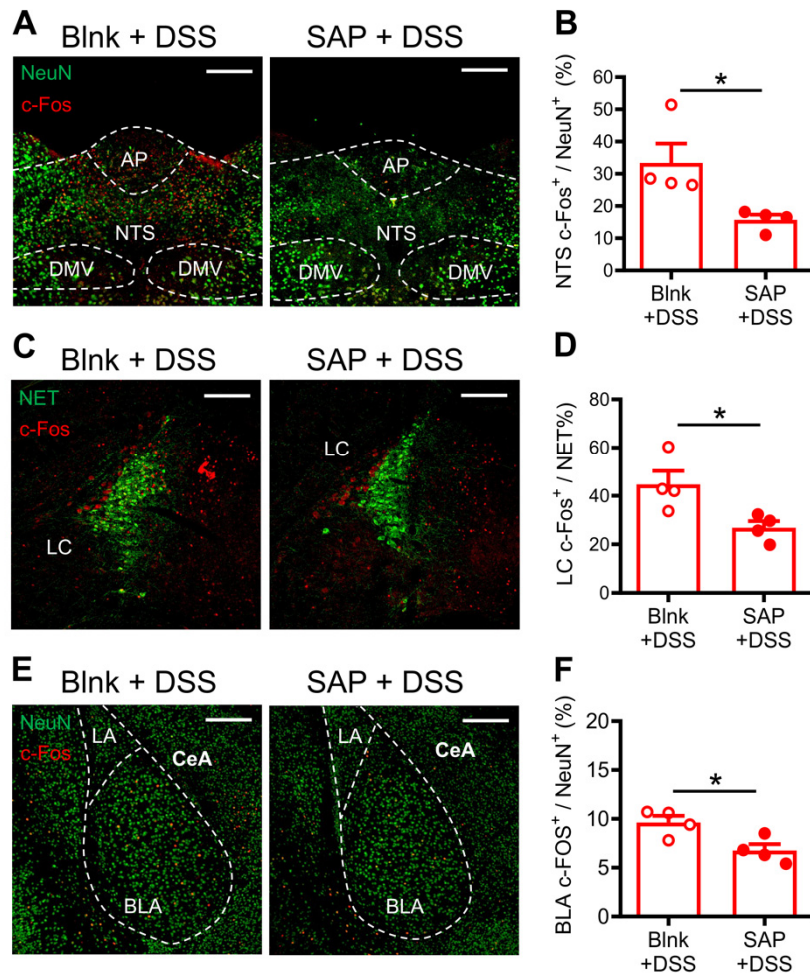

**Supplemental Figure 7. Targeted ablation of vagal afferent neurons by CCK-SAP injection reduces c-Fos expression in multiple brain regions after the elevated plus maze test in DSS-induced colitis mice.** Representative images and quantitative analysis of c-Fos-labeled cells in Blank-SAP-DSS (Blnk + DSS) and CCK-SAP + DSS (SAP + DSS) mice 90 min after the EPM test within the nucleus tractus solitarius (NTS,  $n = 4$  in each group) (**A and B**), locus coeruleus (LC,  $n = 4$  in each group) (**C and D**) and basolateral amygdala (BLA,  $n = 4$  in each group) (**E and F**). Scale bar, 200  $\mu\text{m}$ . AP, area postrema; DMV, dorsal motor nucleus of the vagus; LA, lateral amygdala; CeA, central nucleus of the amygdala. Data represent the mean  $\pm$  SEM.  $*P < 0.05$  by Mann-Whitney  $U$  test (**B**), two-tailed unpaired Student's  $t$ -test (**D and F**).



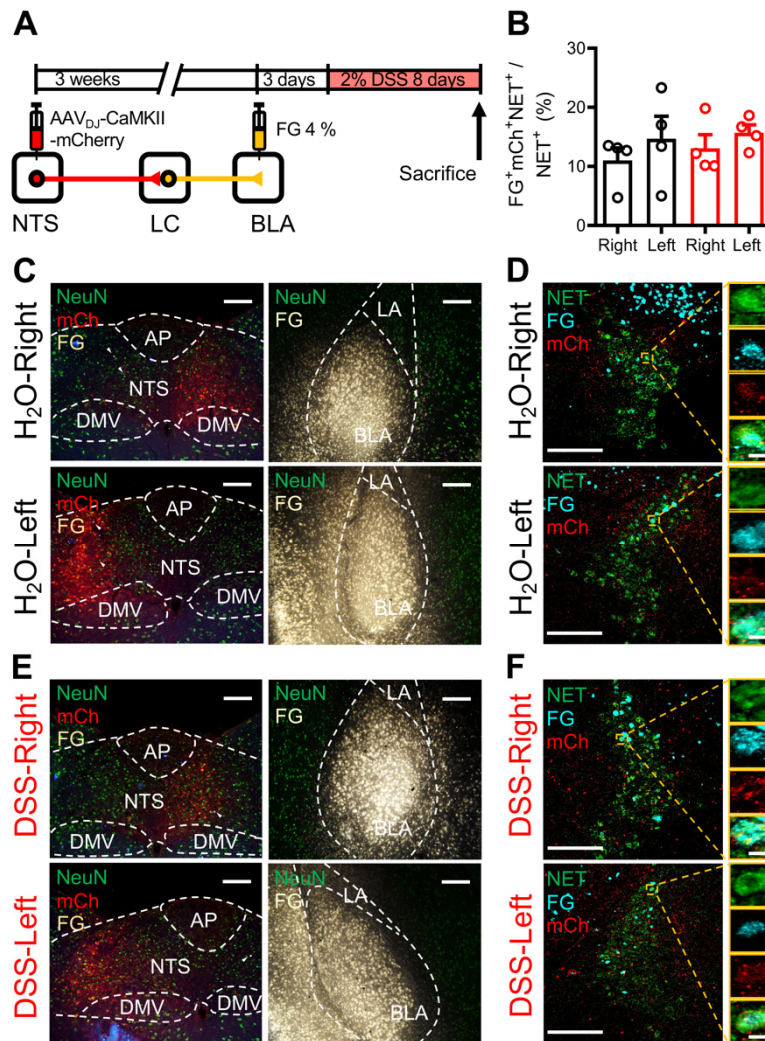

**Supplemental Figure 8. The effect of DSS treatment on unilateral NTS innervated LC-NET neuronal projection to the BLA.** (A) Schematic of the experimental timeline. Mice received AAV<sub>DJ</sub>-CaMKIIa-mCherry injection into right (or left) NTS and incubated for three weeks followed by 4 % FluoroGold (FG) injection into right (or left) BLA. Three days after FG injection, mice received 2 % DSS in drinking water for 8 days and sacrificed on the last day of DSS treatment. (B) Bar graph comparing the amount of LC neurons (NET<sup>+</sup>) as the relay connecting the NTS to the BLA in both sides of H<sub>2</sub>O- and DSS-treated groups (n = 4 in each group). (C and E) Representative image showing tracer injection sites of H<sub>2</sub>O- and DSS-treated groups. CaMKIIa (red, mCh) signals in the NTS and FG signals in the BLA. Arrow heads represent FG signals in NTS from BLA. Scale bar, 200  $\mu$ m. (D and F) Representative image showing FG-labeled LC neurons were immunopositive for NET and CaMKII signals in H<sub>2</sub>O- and DSS-treated groups. Scale bar, 200  $\mu$ m. Augmented figures (Right side) showing NET neurons in rectangle area. Scale bar, 10  $\mu$ m. AP, area postrema; DMV, dorsal motor nucleus of the vagus; LA, lateral amygdala. Data represent the mean  $\pm$  SEM. For statistical analysis, two-way ANOVA for (B).

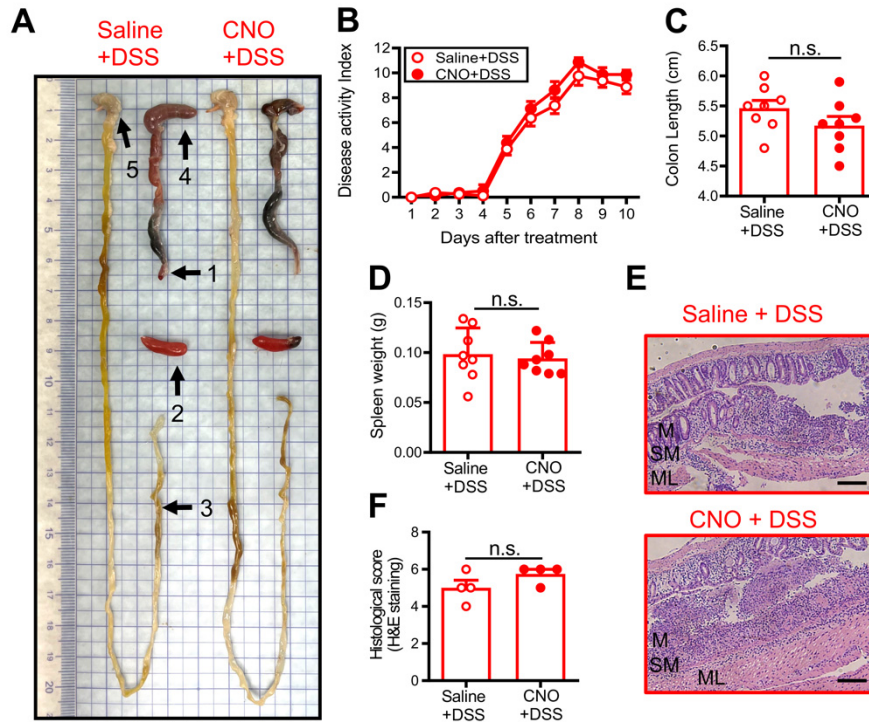

**Supplemental Figure 9. The effect of CNO and saline on DSS-induced colitis phenotypes.** (A) Gross morphology images of Saline + DSS and CNO + DSS groups. Arrows indicate: (1) colon; (2) spleen; (3) small intestine; (4) cecum; and (5) stomach. (B) DAI score was used to evaluate the severity of DSS-induced colitis recorded from D1 to D10 (n = 8 in each group). DAI score was calculated total score (body weight + stool consistency + rectal bleeding). (C) Quantification of colon length in Saline + DSS and CNO + DSS groups (n = 8 in each group). (D) Quantification of spleen weight in Saline + DSS and CNO + DSS groups (n = 8 in each group). (E) H&E staining and (F) histological score of colonic sections were assessed in Saline + DSS and CNO + DSS groups (n = 4 in each group). M: mucosa layer, SM: submucosa layer, and ML: muscular layer. Scale bar, 200  $\mu$ m. Data represent the mean  $\pm$  SEM. n.s., not significant by two-tailed unpaired Student's *t*-test (C and D), Mann-Whitney *U* test (F).

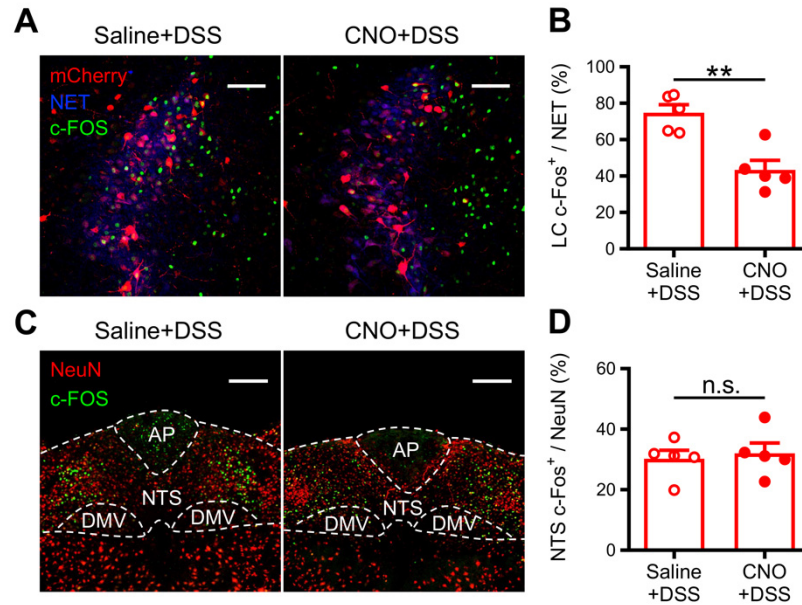

**Supplemental Figure 10. Chemogenetic manipulation reduces c-Fos expression in locus coeruleus but not nucleus tractus solitarius after the elevated plus maze test in DSS-induced colitis mice.** Representative images and quantitative analysis of c-Fos-labeled cells in Saline + DSS and CNO + DSS mice 90 min after the EPM test within the locus coeruleus (LC,  $n = 4$  in each group) (**A and B**) and nucleus tractus solitarius (NTS,  $n = 4$  in each group) (**C and D**). Scale bar, 200  $\mu\text{m}$ . AP, area postrema; DMV, dorsal motor nucleus of the vagus. Data represent the mean  $\pm$  SEM. \*\*  $P < 0.01$  and ns., not significant by two-tailed unpaired Student's  $t$ -test (**B and D**).

**Table S1. Details of statistical data**

| Figure No. | Parameter              | Test specifications | Genotype | Treatment | Sex  | Number of individuals | Mean ± SEM   | Statistical test                     | Fixed effects F(DFn,DFd)                   | p = value |
|------------|------------------------|---------------------|----------|-----------|------|-----------------------|--------------|--------------------------------------|--------------------------------------------|-----------|
| Fig.1B     | Body weight            | H2O                 | WT       | -         | Male | 10                    | -            | Two-way RM ANOVA                     | Time x DSS<br>F <sub>(7,126)</sub> = 42.39 | p < 0.001 |
|            |                        | DSS                 | WT       | -         | Male | 10                    |              |                                      |                                            |           |
| Figure     | Parameter              | Test specifications | Genotype | Treatment | Sex  | Number of individuals | Mean ± SEM   | Statistical test                     | t-distribution t, df                       | p = value |
| Fig.1D     | Colon length (cm)      | H2O                 | WT       | -         | Male | 10                    | 7.67 ± 0.11  | Mann-Whitney U test                  | -                                          | p < 0.001 |
|            |                        | DSS                 | WT       | -         | Male | 10                    | 5.20 ± 0.27  |                                      |                                            |           |
| Fig.1E     | Intestine length (cm)  | H2O                 | WT       | -         | Male | 10                    | 42.92 ± 0.69 | Two-tailed unpaired Student's t-test | t <sub>(18)</sub> = 2.96                   | p = 0.009 |
|            |                        | DSS                 | WT       | -         | Male | 10                    | 38.11 ± 1.48 |                                      |                                            |           |
| Fig.1F     | Spleen weight (g)      | H2O                 | WT       | -         | Male | 10                    | 0.06 ± 0.01  | Two-tailed unpaired Student's t-test | t <sub>(18)</sub> = 7.19                   | p < 0.001 |
|            |                        | DSS                 | WT       | -         | Male | 10                    | 0.12 ± 0.01  |                                      |                                            |           |
| Fig.1H     | Histological score     | H2O                 | WT       | -         | Male | 6                     | 0.50 ± 0.22  | Mann-Whitney U test                  | -                                          | p = 0.002 |
|            |                        | DSS                 | WT       | -         | Male | 6                     | 4.33 ± 0.67  |                                      |                                            |           |
| Fig.1I     | FITC-Dextran (ng/ml)   | H2O                 | WT       | -         | Male | 10                    | 0.64 ± 0.15  | Two-tailed unpaired Student's t-test | t <sub>(18)</sub> = 2.89                   | p = 0.001 |
|            |                        | DSS                 | WT       | -         | Male | 10                    | 1.45 ± 0.24  |                                      |                                            |           |
| Figure     | Parameter              | Test specifications | Genotype | Treatment | Sex  | Number of individuals | Mean ± SEM   | Statistical test                     | Fixed effects F(DFn,DFd)                   | p = value |
| Fig.1J     | Disease activity index | H2O                 | WT       | -         | Male | 10                    | -            | Two-way RM ANOVA                     | Time x DSS<br>F <sub>(9,162)</sub> = 71.55 | p < 0.001 |
|            |                        | DSS                 | WT       | -         | Male | 10                    |              |                                      |                                            |           |

| Figure | Parameter | Test specifications  | Genotype | Treatment | Sex | Number of individuals | Median (Q1,Q3) | Statistical test     | t-distribution t, df                 | p = value                |           |
|--------|-----------|----------------------|----------|-----------|-----|-----------------------|----------------|----------------------|--------------------------------------|--------------------------|-----------|
| Fig.2B | OFT       | total distance (m)   | H2O      | WT        | -   | Male                  | 13             | 44.10 (36.08, 48.96) | Mann-Whitney U test                  | -                        | p < 0.001 |
|        |           |                      | DSS      | WT        | -   | Male                  | 12             | 22.35 (18.71, 24.38) |                                      |                          |           |
| Fig.2C | OFT       | time in center (sec) | H2O      | WT        | -   | Male                  | 13             | 14.00 (10.50, 16.50) | Two-tailed unpaired Student's t-test | t <sub>(23)</sub> = 5.45 | p < 0.001 |
|        |           |                      | DSS      | WT        | -   | Male                  | 12             | 5.50 (2.00, 7.00)    |                                      |                          |           |
| Fig.2D | LDB       | duration (sec)       | H2O      | WT        | -   | Male                  | 13             | 36.00 (25.00, 50.00) | Two-tailed unpaired Student's t-test | t <sub>(23)</sub> = 2.30 | p = 0.031 |
|        |           |                      | DSS      | WT        | -   | Male                  | 12             | 18.50 (9.00, 40.75)  |                                      |                          |           |
| Fig.2E | LDB       | entries              | H2O      | WT        | -   | Male                  | 13             | 13.00 (9.50, 17.50)  | Two-tailed unpaired Student's t-test | t <sub>(23)</sub> = 2.03 | p = 0.054 |
|        |           |                      | DSS      | WT        | -   | Male                  | 12             | 8.00 (3.00, 11.50)   |                                      |                          |           |
| Fig.2G | EPM       | total distance (m)   | H2O      | WT        | -   | Male                  | 13             | 16.12 (8.84, 18.64)  | Mann-Whitney U test                  | -                        | p = 0.016 |
|        |           |                      | DSS      | WT        | -   | Male                  | 12             | 7.59 (5.28, 11.11)   |                                      |                          |           |
| Fig.2H | EPM       | open arms (sec)      | H2O      | WT        | -   | Male                  | 13             | 15.20 (4.40, 22.80)  | Mann-Whitney U test                  | -                        | p = 0.035 |
|        |           |                      | DSS      | WT        | -   | Male                  | 12             | 1.35 (0.53, 6.40)    |                                      |                          |           |
| Fig.2I | EPM       | closed arms (sec)    | H2O      | WT        | -   | Male                  | 13             | 60.80 (47.95, 90.35) | Two-tailed unpaired Student's t-test | t <sub>(23)</sub> = 2.40 | p = 0.025 |
|        |           |                      | DSS      | WT        | -   | Male                  | 12             | 89.60 (74.78, 96.73) |                                      |                          |           |

| Figure | Parameter       | Test specifications | Genotype | Treatment | Sex  | Number of individuals | Mean ± SEM  | Statistical test                   | Dunn's test    | p = value |
|--------|-----------------|---------------------|----------|-----------|------|-----------------------|-------------|------------------------------------|----------------|-----------|
| Fig.3C | Food intake (g) | Sham                | WT       | -         | Male | 23                    | 0.57 ± 0.02 | Kruskal-Wallis test<br>(p < 0.001) | -              | -         |
|        |                 | GV-Bi               | WT       | -         | Male | 24                    | 0.82 ± 0.04 |                                    | Sham vs. GV    | p < 0.001 |
|        |                 | SDV                 | WT       | -         | Male | 23                    | 1.03 ± 0.07 |                                    | Sham vs. SDV   | p < 0.001 |
|        |                 | GV-R                | WT       | -         | Male | 13                    | 0.73 ± 0.04 |                                    | Sham vs. GV-R  | p = 0.033 |
|        |                 | SDV-R               | WT       | -         | Male | 12                    | 0.83 ± 0.03 |                                    | Sham vs. SDV-R | p < 0.001 |
|        |                 | V-L                 | WT       | -         | Male | 13                    | 0.84 ± 0.04 |                                    | Sham vs. V-L   | p < 0.001 |

| Figure | Parameter | Test specifications | Genotype | Treatment | Sex              | Number of individuals | Median (Q1,Q3) | Statistical test     | t-distribution t, df                 | p = value                |           |
|--------|-----------|---------------------|----------|-----------|------------------|-----------------------|----------------|----------------------|--------------------------------------|--------------------------|-----------|
| Fig.3D | OFT       | total distance (m)  | Sham     | WT        | H <sub>2</sub> O | Male                  | 10             | 50.35 (39.53, 55.98) | Two-tailed unpaired Student's t-test | t <sub>(21)</sub> = 8.61 | p < 0.001 |
|        |           |                     | Sham     | WT        | DSS              | Male                  | 13             | 17.59 (12.91, 23.51) |                                      |                          |           |

| Figure | Parameter |                    | Test specifications | Genotype  | Treatment        | Sex           | Number of individuals | Median (Q1,Q3)            | Statistical test | Fixed effects F(DFn,DFd)                     | p = value                   |  |  |  |
|--------|-----------|--------------------|---------------------|-----------|------------------|---------------|-----------------------|---------------------------|------------------|----------------------------------------------|-----------------------------|--|--|--|
| Fig.3D | OFT       | total distance (m) | Sham                | WT        | H <sub>2</sub> O | Male          | 10                    | 50.35 (39.53, 55.98)      | Two-way ANOVA    | DSS x Vagotomy<br>F <sub>(1,43)</sub> = 1.91 | p = 0.175                   |  |  |  |
|        |           |                    | GV-Bi               | WT        | H <sub>2</sub> O | Male          | 10                    | 33.50 (28.03, 39.70)      |                  |                                              |                             |  |  |  |
|        |           |                    | Sham                | WT        | DSS              | Male          | 13                    | 17.59 (12.91, 23.51)      |                  |                                              |                             |  |  |  |
|        |           |                    |                     |           |                  | <b>GV-Bi</b>  | <b>WT</b>             | <b>DSS</b>                | <b>Male</b>      | <b>14</b>                                    | <b>25.38 (16.88, 34.07)</b> |  |  |  |
|        |           |                    | Sham                | WT        | H <sub>2</sub> O | Male          | 10                    | 50.35 (39.53, 55.98)      | Two-way ANOVA    | DSS x Vagotomy<br>F <sub>(1,42)</sub> = 0.16 | p = 0.688                   |  |  |  |
|        |           |                    | GV-Bi               | WT        | H <sub>2</sub> O | Male          | 10                    | 33.50 (28.03, 39.70)      |                  |                                              |                             |  |  |  |
|        |           |                    | Sham                | WT        | DSS              | Male          | 13                    | 17.59 (12.91, 23.51)      |                  |                                              |                             |  |  |  |
|        |           |                    |                     |           |                  | <b>GV-R</b>   | <b>WT</b>             | <b>DSS</b>                | <b>Male</b>      | <b>13</b>                                    | <b>16.20 (11.15, 19.25)</b> |  |  |  |
|        |           |                    | Sham                | WT        | H <sub>2</sub> O | Male          | 10                    | 50.35 (39.53, 55.98)      | Two-way ANOVA    | DSS x Vagotomy<br>F <sub>(1,42)</sub> = 0.38 | p = 0.542                   |  |  |  |
|        |           |                    | GV-Bi               | WT        | H <sub>2</sub> O | Male          | 10                    | 33.50 (28.03, 39.70)      |                  |                                              |                             |  |  |  |
|        |           |                    | Sham                | WT        | DSS              | Male          | 13                    | 17.59 (12.91, 23.51)      |                  |                                              |                             |  |  |  |
|        |           |                    | <b>V-L</b>          | <b>WT</b> | <b>DSS</b>       | <b>Male</b>   | <b>13</b>             | <b>9.90 (7.75, 21.15)</b> |                  |                                              |                             |  |  |  |
| Fig.3D | OFT       | total distance (m) | Sham                | WT        | H <sub>2</sub> O | Male          | 10                    | 50.35 (39.53, 55.98)      | Two-way ANOVA    | DSS x Vagotomy<br>F <sub>(1,43)</sub> = 0.67 | p = 0.417                   |  |  |  |
|        |           |                    | SDV-Bi              | WT        | H <sub>2</sub> O | Male          | 10                    | 42.80 (35.95, 55.75)      |                  |                                              |                             |  |  |  |
|        |           |                    | Sham                | WT        | DSS              | Male          | 13                    | 17.59 (12.91, 23.51)      |                  |                                              |                             |  |  |  |
|        |           |                    |                     |           |                  | <b>SDV-Bi</b> | <b>WT</b>             | <b>DSS</b>                | <b>Male</b>      | <b>13</b>                                    | <b>14.60 (8.95, 17.10)</b>  |  |  |  |
|        |           |                    | Sham                | WT        | H <sub>2</sub> O | Male          | 10                    | 50.35 (39.53, 55.98)      | Two-way ANOVA    | DSS x Vagotomy<br>F <sub>(1,41)</sub> = 2.42 | p = 0.127                   |  |  |  |
|        |           |                    | SDV-Bi              | WT        | H <sub>2</sub> O | Male          | 10                    | 42.80 (35.95, 55.75)      |                  |                                              |                             |  |  |  |
|        |           |                    | Sham                | WT        | DSS              | Male          | 13                    | 17.59 (12.91, 23.51)      |                  |                                              |                             |  |  |  |
|        |           |                    |                     |           |                  | <b>SDV-R</b>  | <b>WT</b>             | <b>DSS</b>                | <b>Male</b>      | <b>12</b>                                    | <b>17.30 (11.18, 23.18)</b> |  |  |  |
|        |           |                    | Sham                | WT        | H <sub>2</sub> O | Male          | 10                    | 50.35 (39.53, 55.98)      | Two-way ANOVA    | DSS x Vagotomy<br>F <sub>(1,42)</sub> = 0.92 | p = 0.342                   |  |  |  |
|        |           |                    | SDV-Bi              | WT        | H <sub>2</sub> O | Male          | 10                    | 42.80 (35.95, 55.75)      |                  |                                              |                             |  |  |  |
|        |           |                    | Sham                | WT        | DSS              | Male          | 13                    | 17.59 (12.91, 23.51)      |                  |                                              |                             |  |  |  |
|        |           |                    | <b>V-L</b>          | <b>WT</b> | <b>DSS</b>       | <b>Male</b>   | <b>13</b>             | <b>9.90 (7.75, 21.15)</b> |                  |                                              |                             |  |  |  |

| Figure | Parameter |                      | Test specifications | Genotype | Treatment        | Sex  | Number of individuals | Median (Q1,Q3)     | Statistical test                     | t-distribution t, df     | p = value |
|--------|-----------|----------------------|---------------------|----------|------------------|------|-----------------------|--------------------|--------------------------------------|--------------------------|-----------|
| Fig.3E | OFT       | time in center (sec) | Sham                | WT       | H <sub>2</sub> O | Male | 10                    | 8.45 (7.25, 14.45) | Two-tailed unpaired Student's t-test | t <sub>(21)</sub> = 4.27 | p < 0.001 |
|        |           |                      | Sham                | WT       | DSS              | Male | 13                    | 2.00 (1.00, 5.00)  |                                      |                          |           |

| Figure | Parameter |                      | Test specifications | Genotype  | Treatment        | Sex           | Number of individuals | Median (Q1,Q3)           | Statistical test | Fixed effects F(DFn,DFd)                     | p = value                 |  |  |  |
|--------|-----------|----------------------|---------------------|-----------|------------------|---------------|-----------------------|--------------------------|------------------|----------------------------------------------|---------------------------|--|--|--|
| Fig.3E | OFT       | time in center (sec) | Sham                | WT        | H <sub>2</sub> O | Male          | 10                    | 8.45 (7.25, 14.45)       | Two-way ANOVA    | DSS x Vagotomy<br>F <sub>(1,43)</sub> = 1.84 | p = 0.182                 |  |  |  |
|        |           |                      | GV-Bi               | WT        | H <sub>2</sub> O | Male          | 10                    | 8.90 (7.45, 10.78)       |                  |                                              |                           |  |  |  |
|        |           |                      | Sham                | WT        | DSS              | Male          | 13                    | 2.00 (1.00, 5.00)        |                  |                                              |                           |  |  |  |
|        |           |                      |                     |           |                  | <b>GV-Bi</b>  | <b>WT</b>             | <b>DSS</b>               | <b>Male</b>      | <b>14</b>                                    | <b>2.50 (1.70, 6.25)</b>  |  |  |  |
|        |           |                      | Sham                | WT        | H <sub>2</sub> O | Male          | 10                    | 8.45 (7.25, 14.45)       | Two-way ANOVA    | DSS x Vagotomy<br>F <sub>(1,42)</sub> = 1.57 | p = 0.218                 |  |  |  |
|        |           |                      | GV-Bi               | WT        | H <sub>2</sub> O | Male          | 10                    | 8.90 (7.45, 10.78)       |                  |                                              |                           |  |  |  |
|        |           |                      | Sham                | WT        | DSS              | Male          | 13                    | 2.00 (1.00, 5.00)        |                  |                                              |                           |  |  |  |
|        |           |                      |                     |           |                  | <b>GV-R</b>   | <b>WT</b>             | <b>DSS</b>               | <b>Male</b>      | <b>13</b>                                    | <b>2.80 (1.05, 6.10)</b>  |  |  |  |
|        |           |                      | Sham                | WT        | H <sub>2</sub> O | Male          | 10                    | 8.45 (7.25, 14.45)       | Two-way ANOVA    | DSS x Vagotomy<br>F <sub>(1,42)</sub> = 0.73 | p = 0.398                 |  |  |  |
|        |           |                      | GV-Bi               | WT        | H <sub>2</sub> O | Male          | 10                    | 8.90 (7.45, 10.78)       |                  |                                              |                           |  |  |  |
|        |           |                      | Sham                | WT        | DSS              | Male          | 13                    | 2.00 (1.00, 5.00)        |                  |                                              |                           |  |  |  |
|        |           |                      | <b>V-L</b>          | <b>WT</b> | <b>DSS</b>       | <b>Male</b>   | <b>13</b>             | <b>0.80 (0.20, 4.65)</b> |                  |                                              |                           |  |  |  |
| Fig.3E | OFT       | time in center (sec) | Sham                | WT        | H <sub>2</sub> O | Male          | 10                    | 8.45 (7.25, 14.45)       | Two-way ANOVA    | DSS x Vagotomy<br>F <sub>(1,43)</sub> = 3.86 | p = 0.056                 |  |  |  |
|        |           |                      | SDV-Bi              | WT        | H <sub>2</sub> O | Male          | 10                    | 9.05 (5.28, 10.80)       |                  |                                              |                           |  |  |  |
|        |           |                      | Sham                | WT        | DSS              | Male          | 13                    | 2.00 (1.00, 5.00)        |                  |                                              |                           |  |  |  |
|        |           |                      |                     |           |                  | <b>SDV-Bi</b> | <b>WT</b>             | <b>DSS</b>               | <b>Male</b>      | <b>13</b>                                    | <b>5.40 (1.95, 17.40)</b> |  |  |  |
|        |           |                      | Sham                | WT        | H <sub>2</sub> O | Male          | 10                    | 8.45 (7.25, 14.45)       | Two-way ANOVA    | DSS x Vagotomy<br>F <sub>(1,41)</sub> = 4.26 | p = 0.045                 |  |  |  |
|        |           |                      | SDV-Bi              | WT        | H <sub>2</sub> O | Male          | 10                    | 9.05 (5.28, 10.80)       |                  |                                              |                           |  |  |  |
|        |           |                      | Sham                | WT        | DSS              | Male          | 13                    | 2.00 (1.00, 5.00)        |                  |                                              |                           |  |  |  |
|        |           |                      | <b>SDV-R</b>        | <b>WT</b> | <b>DSS</b>       | <b>Male</b>   | <b>12</b>             | <b>4.70 (1.75, 6.90)</b> |                  |                                              |                           |  |  |  |



| Figure | Parameter |                      | Test specifications | Genotype | Treatment        | Sex  | Number of individuals | Median (Q1,Q3)     | Statistical test | Fixed effects F(DFn,DFd)                     | p = value |
|--------|-----------|----------------------|---------------------|----------|------------------|------|-----------------------|--------------------|------------------|----------------------------------------------|-----------|
| Fig.3E | OFT       | time in center (sec) | Sham                | WT       | H <sub>2</sub> O | Male | 10                    | 8.45 (7.25, 14.45) | Two-way ANOVA    | DSS x Vagotomy<br>F <sub>(1,42)</sub> = 1.41 | p = 0.241 |
|        |           |                      | SDV-Bi              | WT       | H <sub>2</sub> O | Male | 10                    | 9.05 (5.28, 10.80) |                  |                                              |           |
|        |           |                      | Sham                | WT       | DSS              | Male | 13                    | 2.00 (1.00, 5.00)  |                  |                                              |           |
|        |           |                      | V-L                 | WT       | DSS              | Male | 13                    | 0.80 (0.20, 4.65)  |                  |                                              |           |

| Figure | Parameter |                      | Test specifications | Genotype | Treatment        | Sex  | Number of individuals | Median (Q1,Q3)     | Statistical test                                   | Compared Groups                                   | p = value              |           |
|--------|-----------|----------------------|---------------------|----------|------------------|------|-----------------------|--------------------|----------------------------------------------------|---------------------------------------------------|------------------------|-----------|
| Fig.3E | OFT       | time in center (sec) |                     |          |                  |      |                       |                    | Two-way ANOVA<br>Tukey's Multiple Comparisons test | H <sub>2</sub> O Sham vs. H <sub>2</sub> O SDV-Bi | p = 0.160              |           |
|        |           |                      | Sham                | WT       | H <sub>2</sub> O | Male | 10                    | 8.45 (7.25, 14.45) |                                                    | H <sub>2</sub> O Sham vs. DSS Sham                | p < 0.001              |           |
|        |           |                      | SDV-Bi              | WT       | H <sub>2</sub> O | Male | 10                    | 9.05 (5.28, 10.80) |                                                    | H <sub>2</sub> O Sham vs. DSS SDV-R               | p < 0.001              |           |
|        |           |                      | Sham                | WT       | DSS              | Male | 13                    | 2.00 (1.00, 5.00)  |                                                    | H <sub>2</sub> O SDV-Bi vs. DSS Sham              | p = 0.003              |           |
|        |           |                      | SDV-R               | WT       | DSS              | Male | 12                    | 4.70 (1.75, 6.90)  |                                                    | H <sub>2</sub> O SDV-Bi vs. DSS SDV-R             | p = 0.022              |           |
|        |           |                      |                     |          |                  |      |                       |                    |                                                    |                                                   | DSS Sham vs. DSS SDV-R | p = 0.891 |
|        |           |                      |                     |          |                  |      |                       |                    |                                                    |                                                   |                        |           |

| Figure | Parameter |                | Test specifications | Genotype | Treatment        | Sex  | Number of individuals | Median (Q1,Q3)       | Statistical test                     | t-distribution t, df     | p = value |
|--------|-----------|----------------|---------------------|----------|------------------|------|-----------------------|----------------------|--------------------------------------|--------------------------|-----------|
| Fig.3F | LDB       | duration (sec) | Sham                | WT       | H <sub>2</sub> O | Male | 10                    | 32.50 (20.50, 43.25) | Two-tailed unpaired Student's t-test | t <sub>(21)</sub> = 3.89 | p < 0.001 |
|        |           |                | Sham                | WT       | DSS              | Male | 13                    | 10.00 (6.00, 24.00)  |                                      |                          |           |

| Figure | Parameter |                  | Test specifications | Genotype | Treatment            | Sex           | Number of individuals                        | Median (Q1,Q3)       | Statistical test | Fixed effects F(DFn,DFd)                     | p = value |
|--------|-----------|------------------|---------------------|----------|----------------------|---------------|----------------------------------------------|----------------------|------------------|----------------------------------------------|-----------|
| Fig.3F | LDB       | duration (sec)   | Sham                | WT       | H <sub>2</sub> O     | Male          | 10                                           | 32.50 (20.50, 43.25) | Two-way ANOVA    | DSS x Vagotomy<br>F <sub>(1,43)</sub> = 9.78 | p = 0.003 |
|        |           |                  | GV-Bi               | WT       | H <sub>2</sub> O     | Male          | 10                                           | 26.00 (21.25, 41.00) |                  |                                              |           |
|        |           |                  | Sham                | WT       | DSS                  | Male          | 13                                           | 10.00 (6.00, 24.00)  |                  |                                              |           |
|        |           |                  | GV-Bi               | WT       | DSS                  | Male          | 14                                           | 46.85 (20.58, 62.10) | Two-way ANOVA    | DSS x Vagotomy<br>F <sub>(1,42)</sub> = 2.22 | p = 0.144 |
|        |           |                  | Sham                | WT       | H <sub>2</sub> O     | Male          | 10                                           | 32.50 (20.50, 43.25) |                  |                                              |           |
|        |           |                  | GV-Bi               | WT       | H <sub>2</sub> O     | Male          | 10                                           | 26.00 (21.25, 41.00) |                  |                                              |           |
|        |           |                  | Sham                | WT       | DSS                  | Male          | 13                                           | 10.00 (6.00, 24.00)  |                  |                                              |           |
|        |           |                  | GV-R                | WT       | DSS                  | Male          | 13                                           | 15.80 (7.10, 52.25)  | Two-way ANOVA    | DSS x Vagotomy<br>F <sub>(1,42)</sub> = 0.87 | p = 0.356 |
|        |           |                  | Sham                | WT       | H <sub>2</sub> O     | Male          | 10                                           | 32.50 (20.50, 43.25) |                  |                                              |           |
|        |           |                  | GV-Bi               | WT       | H <sub>2</sub> O     | Male          | 10                                           | 26.00 (21.25, 41.00) |                  |                                              |           |
| Sham   | WT        | DSS              | Male                | 13       | 10.00 (6.00, 24.00)  | Two-way ANOVA | DSS x Vagotomy<br>F <sub>(1,43)</sub> = 6.07 | p = 0.018            |                  |                                              |           |
| V-L    | WT        | DSS              | Male                | 13       | 14.30 (9.10, 25.10)  |               |                                              |                      |                  |                                              |           |
| Sham   | WT        | H <sub>2</sub> O | Male                | 10       | 32.50 (20.50, 43.25) |               |                                              |                      |                  |                                              |           |
| SDV-Bi | WT        | H <sub>2</sub> O | Male                | 10       | 29.50 (19.00, 38.25) |               |                                              |                      |                  |                                              |           |
| Fig.3F | LDB       | duration (sec)   | Sham                | WT       | DSS                  | Male          | 13                                           | 10.00 (6.00, 24.00)  | Two-way ANOVA    | DSS x Vagotomy<br>F <sub>(1,41)</sub> = 3.32 | p = 0.076 |
|        |           |                  | SDV-Bi              | WT       | DSS                  | Male          | 13                                           | 21.20 (14.25, 35.85) |                  |                                              |           |
|        |           |                  | Sham                | WT       | H <sub>2</sub> O     | Male          | 10                                           | 32.50 (20.50, 43.25) |                  |                                              |           |
|        |           |                  | SDV-Bi              | WT       | H <sub>2</sub> O     | Male          | 10                                           | 29.50 (19.00, 38.25) | Two-way ANOVA    | DSS x Vagotomy<br>F <sub>(1,42)</sub> = 2.08 | p = 0.157 |
|        |           |                  | Sham                | WT       | DSS                  | Male          | 13                                           | 10.00 (6.00, 24.00)  |                  |                                              |           |
|        |           |                  | SDV-R               | WT       | DSS                  | Male          | 12                                           | 21.75 (8.43, 31.95)  |                  |                                              |           |
|        |           |                  | Sham                | WT       | H <sub>2</sub> O     | Male          | 10                                           | 32.50 (20.50, 43.25) |                  |                                              |           |
|        |           |                  | SDV-Bi              | WT       | H <sub>2</sub> O     | Male          | 10                                           | 29.50 (19.00, 38.25) |                  |                                              |           |
| Sham   | WT        | DSS              | Male                | 13       | 10.00 (6.00, 24.00)  |               |                                              |                      |                  |                                              |           |
| V-L    | WT        | DSS              | Male                | 13       | 14.30 (9.10, 25.10)  |               |                                              |                      |                  |                                              |           |

| Figure | Parameter |                | Test specifications | Genotype | Treatment        | Sex  | Number of individuals | Median (Q1,Q3)       | Statistical test                                   | Compared Groups                                  | p = value              |
|--------|-----------|----------------|---------------------|----------|------------------|------|-----------------------|----------------------|----------------------------------------------------|--------------------------------------------------|------------------------|
| Fig.3F | LDB       | duration (sec) |                     |          |                  |      |                       |                      | Two-way ANOVA<br>Tukey's Multiple Comparisons test | H <sub>2</sub> O Sham vs. H <sub>2</sub> O GV-Bi | p = 0.984              |
|        |           |                | Sham                | WT       | H <sub>2</sub> O | Male | 10                    | 32.50 (20.50, 43.25) |                                                    | H <sub>2</sub> O Sham vs. DSS Sham               | p = 0.022              |
|        |           |                | GV-Bi               | WT       | H <sub>2</sub> O | Male | 10                    | 26.00 (21.25, 41.00) |                                                    | H <sub>2</sub> O Sham vs. DSS GV-Bi              | p = 0.737              |
|        |           |                | Sham                | WT       | DSS              | Male | 13                    | 10.00 (6.00, 24.00)  |                                                    | H <sub>2</sub> O GV-Bi vs. DSS Sham              | p = 0.056              |
|        |           |                | GV-Bi               | WT       | DSS              | Male | 14                    | 46.85 (20.58, 62.10) |                                                    | H <sub>2</sub> O GV-Bi vs. DSS GV-Bi             | p = 0.502              |
|        |           |                |                     |          |                  |      |                       |                      |                                                    |                                                  | DSS Sham vs. DSS GV-Bi |

| Figure | Parameter |                | Test specifications | Genotype | Treatment        | Sex  | Number of individuals | Median (Q1,Q3)       | Statistical test                                   | Compared Groups                                   | p = value               |
|--------|-----------|----------------|---------------------|----------|------------------|------|-----------------------|----------------------|----------------------------------------------------|---------------------------------------------------|-------------------------|
| Fig.3F | LDB       | duration (sec) |                     |          |                  |      |                       |                      | Two-way ANOVA<br>Tukey's Multiple Comparisons test | H <sub>2</sub> O Sham vs. H <sub>2</sub> O SDV-Bi | p = 0.592               |
|        |           |                | Sham                | WT       | H <sub>2</sub> O | Male | 10                    | 32.50 (20.50, 43.25) |                                                    | H <sub>2</sub> O Sham vs. DSS Sham                | p < 0.001               |
|        |           |                | SDV-Bi              | WT       | H <sub>2</sub> O | Male | 10                    | 29.50 (19.00, 38.25) |                                                    | H <sub>2</sub> O Sham vs. DSS SDV-Bi              | p = 0.146               |
|        |           |                | Sham                | WT       | DSS              | Male | 13                    | 10.00 (6.00, 24.00)  |                                                    | H <sub>2</sub> O SDV-Bi vs. DSS Sham              | p = 0.028               |
|        |           |                | SDV-Bi              | WT       | DSS              | Male | 13                    | 21.20 (14.25, 35.85) |                                                    | H <sub>2</sub> O SDV-Bi vs. DSS SDV-Bi            | p = 0.847               |
|        |           |                |                     |          |                  |      |                       |                      |                                                    |                                                   | DSS Sham vs. DSS SDV-Bi |

| Figure | Parameter |         | Test specifications | Genotype | Treatment        | Sex  | Number of individuals | Median (Q1,Q3)      | Statistical test    | t-distribution t, df | p = value |
|--------|-----------|---------|---------------------|----------|------------------|------|-----------------------|---------------------|---------------------|----------------------|-----------|
| Fig.3G | LDB       | entries | Sham                | WT       | H <sub>2</sub> O | Male | 10                    | 12.50 (8.75, 15.25) | Mann-Whitney U test | -                    | p < 0.001 |
|        |           |         | Sham                | WT       | DSS              | Male | 13                    | 3.00 (2.00, 5.50)   |                     |                      |           |

| Figure     | Parameter |            | Test specifications | Genotype  | Treatment                | Sex         | Number of individuals | Median (Q1,Q3)              | Statistical test | Fixed effects F(DFn,DFd)                     | p = value |
|------------|-----------|------------|---------------------|-----------|--------------------------|-------------|-----------------------|-----------------------------|------------------|----------------------------------------------|-----------|
| Fig.3G     | LDB       | entries    | Sham                | WT        | H <sub>2</sub> O         | Male        | 10                    | 12.50 (8.75, 15.25)         | Two-way ANOVA    | DSS x Vagotomy<br>F <sub>(1,43)</sub> = 4.80 | p = 0.034 |
|            |           |            | GV-Bi               | WT        | H <sub>2</sub> O         | Male        | 10                    | 10.50 (7.75, 15.00)         |                  |                                              |           |
|            |           |            | Sham                | WT        | DSS                      | Male        | 13                    | 3.00 (2.00, 5.50)           |                  |                                              |           |
|            |           |            | <b>GV-Bi</b>        | <b>WT</b> | <b>DSS</b>               | <b>Male</b> | <b>14</b>             | <b>6.00 (4.75, 12.00)</b>   |                  |                                              |           |
|            |           |            | Sham                | WT        | H <sub>2</sub> O         | Male        | 10                    | 12.50 (8.75, 15.25)         | Two-way ANOVA    | DSS x Vagotomy<br>F <sub>(1,42)</sub> = 0.07 | p = 0.790 |
|            |           |            | GV-Bi               | WT        | H <sub>2</sub> O         | Male        | 10                    | 10.50 (7.75, 15.00)         |                  |                                              |           |
|            |           |            | Sham                | WT        | DSS                      | Male        | 13                    | 3.00 (2.00, 5.50)           |                  |                                              |           |
|            |           |            | <b>GV-R</b>         | <b>WT</b> | <b>DSS</b>               | <b>Male</b> | <b>13</b>             | <b>3.00 (1.00, 5.00)</b>    |                  |                                              |           |
|            |           |            | Sham                | WT        | H <sub>2</sub> O         | Male        | 10                    | 12.50 (8.75, 15.25)         | Two-way ANOVA    | DSS x Vagotomy<br>F <sub>(1,42)</sub> = 0.19 | p = 0.664 |
|            |           |            | GV-Bi               | WT        | H <sub>2</sub> O         | Male        | 10                    | 10.50 (7.75, 15.00)         |                  |                                              |           |
| Sham       | WT        | DSS        | Male                | 13        | 3.00 (2.00, 5.50)        |             |                       |                             |                  |                                              |           |
| <b>V-L</b> | <b>WT</b> | <b>DSS</b> | <b>Male</b>         | <b>13</b> | <b>3.00 (2.00, 3.50)</b> |             |                       |                             |                  |                                              |           |
| Fig.3G     | LDB       | entries    | Sham                | WT        | H <sub>2</sub> O         | Male        | 10                    | 12.50 (8.75, 15.25)         | Two-way ANOVA    | DSS x Vagotomy<br>F <sub>(1,43)</sub> = 0.05 | p = 0.817 |
|            |           |            | SDV-Bi              | WT        | H <sub>2</sub> O         | Male        | 10                    | 13.50 (10.50, 20.00)        |                  |                                              |           |
|            |           |            | Sham                | WT        | DSS                      | Male        | 13                    | 3.00 (2.00, 5.50)           |                  |                                              |           |
|            |           |            | <b>SDV-Bi</b>       | <b>WT</b> | <b>DSS</b>               | <b>Male</b> | <b>13</b>             | <b>21.20 (14.25, 35.85)</b> |                  |                                              |           |
|            |           |            | Sham                | WT        | H <sub>2</sub> O         | Male        | 10                    | 12.50 (8.75, 15.25)         | Two-way ANOVA    | DSS x Vagotomy<br>F <sub>(1,41)</sub> = 0.18 | p = 0.675 |
|            |           |            | SDV-Bi              | WT        | H <sub>2</sub> O         | Male        | 10                    | 13.50 (10.50, 20.00)        |                  |                                              |           |
|            |           |            | Sham                | WT        | DSS                      | Male        | 13                    | 3.00 (2.00, 5.50)           |                  |                                              |           |
|            |           |            | <b>SDV-R</b>        | <b>WT</b> | <b>DSS</b>               | <b>Male</b> | <b>12</b>             | <b>3.00 (2.25, 6.75)</b>    |                  |                                              |           |
|            |           |            | Sham                | WT        | H <sub>2</sub> O         | Male        | 10                    | 12.50 (8.75, 15.25)         | Two-way ANOVA    | DSS x Vagotomy<br>F <sub>(1,42)</sub> = 0.02 | p = 0.888 |
|            |           |            | SDV-Bi              | WT        | H <sub>2</sub> O         | Male        | 10                    | 13.50 (10.50, 20.00)        |                  |                                              |           |
| Sham       | WT        | DSS        | Male                | 13        | 3.00 (2.00, 5.50)        |             |                       |                             |                  |                                              |           |
| <b>V-L</b> | <b>WT</b> | <b>DSS</b> | <b>Male</b>         | <b>13</b> | <b>3.00 (2.00, 3.50)</b> |             |                       |                             |                  |                                              |           |

| Figure | Parameter |         | Test specifications | Genotype  | Treatment        | Sex         | Number of individuals | Median (Q1,Q3)            | Statistical test                                   | Compared Groups                                  | p = value              |           |
|--------|-----------|---------|---------------------|-----------|------------------|-------------|-----------------------|---------------------------|----------------------------------------------------|--------------------------------------------------|------------------------|-----------|
| Fig.3G | LDB       | entries |                     |           |                  |             |                       |                           | Two-way ANOVA<br>Tukey's Multiple Comparisons test | H <sub>2</sub> O Sham vs. H <sub>2</sub> O GV-Bi | p = 0.956              |           |
|        |           |         | Sham                | WT        | H <sub>2</sub> O | Male        | 10                    | 12.50 (8.75, 15.25)       |                                                    | H <sub>2</sub> O Sham vs. DSS Sham               | p < 0.001              |           |
|        |           |         | GV-Bi               | WT        | H <sub>2</sub> O | Male        | 10                    | 10.50 (7.75, 15.00)       |                                                    | H <sub>2</sub> O Sham vs. DSS GV-Bi              | p = 0.216              |           |
|        |           |         | Sham                | WT        | DSS              | Male        | 13                    | 3.00 (2.00, 5.50)         |                                                    | H <sub>2</sub> O GV-Bi vs. DSS Sham              | p = 0.002              |           |
|        |           |         | <b>GV-Bi</b>        | <b>WT</b> | <b>DSS</b>       | <b>Male</b> | <b>14</b>             | <b>6.00 (4.75, 12.00)</b> |                                                    | H <sub>2</sub> O GV-Bi vs. DSS GV-Bi             | p = 0.497              |           |
|        |           |         |                     |           |                  |             |                       |                           |                                                    |                                                  | DSS Sham vs. DSS GV-Bi | p = 0.040 |
|        |           |         |                     |           |                  |             |                       |                           |                                                    |                                                  |                        |           |

| Figure | Parameter |                    | Test specifications | Genotype | Treatment        | Sex  | Number of individuals | Median (Q1,Q3)       | Statistical test    | t-distribution t, df | p = value |
|--------|-----------|--------------------|---------------------|----------|------------------|------|-----------------------|----------------------|---------------------|----------------------|-----------|
| Fig.3H | EPM       | total distance (m) | Sham                | WT       | H <sub>2</sub> O | Male | 10                    | 14.75 (12.28, 17.15) | Mann-Whitney U test | -                    | p < 0.001 |
|        |           |                    | Sham                | WT       | DSS              | Male | 13                    | 4.55 (3.50, 5.48)    |                     |                      |           |

| Figure | Parameter | Test specifications | Genotype   | Treatment | Sex              | Number of individuals | Median (Q1,Q3) | Statistical test         | Fixed effects F(DFn,DFd) | p = value                                     |                            |  |  |  |
|--------|-----------|---------------------|------------|-----------|------------------|-----------------------|----------------|--------------------------|--------------------------|-----------------------------------------------|----------------------------|--|--|--|
| Fig.3H | EPM       | total distance (m)  | Sham       | WT        | H <sub>2</sub> O | Male                  | 10             | 14.75 (12.28, 17.15)     | Two-way ANOVA            | DSS x Vagotomy<br>F <sub>(1,43)</sub> = 4.81  | p = 0.034                  |  |  |  |
|        |           |                     | GV-Bi      | WT        | H <sub>2</sub> O | Male                  | 10             | 11.00 (7.75, 12.43)      |                          |                                               |                            |  |  |  |
|        |           |                     | Sham       | WT        | DSS              | Male                  | 13             | 4.55 (3.50, 5.48)        |                          |                                               |                            |  |  |  |
|        |           |                     |            |           |                  | <b>GV-Bi</b>          | <b>WT</b>      | <b>DSS</b>               | <b>Male</b>              | <b>14</b>                                     | <b>10.08 (5.55, 14.20)</b> |  |  |  |
|        |           |                     | Sham       | WT        | H <sub>2</sub> O | Male                  | 10             | 14.75 (12.28, 17.15)     | Two-way ANOVA            | DSS x Vagotomy<br>F <sub>(1,42)</sub> = 0.07  | p = 0.797                  |  |  |  |
|        |           |                     | GV-Bi      | WT        | H <sub>2</sub> O | Male                  | 10             | 11.00 (7.75, 12.43)      |                          |                                               |                            |  |  |  |
|        |           |                     | Sham       | WT        | DSS              | Male                  | 13             | 4.55 (3.50, 5.48)        |                          |                                               |                            |  |  |  |
|        |           |                     |            |           |                  | <b>GV-R</b>           | <b>WT</b>      | <b>DSS</b>               | <b>Male</b>              | <b>13</b>                                     | <b>4.60 (3.55, 8.90)</b>   |  |  |  |
|        |           |                     | Sham       | WT        | H <sub>2</sub> O | Male                  | 10             | 14.75 (12.28, 17.15)     | Two-way ANOVA            | DSS x Vagotomy<br>F <sub>(1,42)</sub> = 0.44  | p = 0.512                  |  |  |  |
|        |           |                     | GV-Bi      | WT        | H <sub>2</sub> O | Male                  | 10             | 11.00 (7.75, 12.43)      |                          |                                               |                            |  |  |  |
|        |           |                     | Sham       | WT        | DSS              | Male                  | 13             | 4.55 (3.50, 5.48)        |                          |                                               |                            |  |  |  |
|        |           |                     | <b>V-L</b> | <b>WT</b> | <b>DSS</b>       | <b>Male</b>           | <b>13</b>      | <b>6.40 (4.40, 9.85)</b> |                          |                                               |                            |  |  |  |
| Fig.3H | EPM       | total distance (m)  | Sham       | WT        | H <sub>2</sub> O | Male                  | 10             | 14.75 (12.28, 17.15)     | Two-way ANOVA            | DSS x Vagotomy<br>F <sub>(1,43)</sub> = 10.46 | p = 0.002                  |  |  |  |
|        |           |                     | SDV-Bi     | WT        | H <sub>2</sub> O | Male                  | 10             | 16.00 (12.78, 19.15)     |                          |                                               |                            |  |  |  |
|        |           |                     | Sham       | WT        | DSS              | Male                  | 13             | 4.55 (3.50, 5.48)        |                          |                                               |                            |  |  |  |
|        |           |                     |            |           |                  | <b>SDV-Bi</b>         | <b>WT</b>      | <b>DSS</b>               | <b>Male</b>              | <b>13</b>                                     | <b>4.90 (3.35, 7.10)</b>   |  |  |  |
|        |           |                     | Sham       | WT        | H <sub>2</sub> O | Male                  | 10             | 14.75 (12.28, 17.15)     | Two-way ANOVA            | DSS x Vagotomy<br>F <sub>(1,41)</sub> = 9.72  | p = 0.003                  |  |  |  |
|        |           |                     | SDV-Bi     | WT        | H <sub>2</sub> O | Male                  | 10             | 16.00 (12.78, 19.15)     |                          |                                               |                            |  |  |  |
|        |           |                     | Sham       | WT        | DSS              | Male                  | 13             | 4.55 (3.50, 5.48)        |                          |                                               |                            |  |  |  |
|        |           |                     |            |           |                  | <b>SDV-R</b>          | <b>WT</b>      | <b>DSS</b>               | <b>Male</b>              | <b>12</b>                                     | <b>4.55 (3.93, 6.15)</b>   |  |  |  |
|        |           |                     | Sham       | WT        | H <sub>2</sub> O | Male                  | 10             | 14.75 (12.28, 17.15)     | Two-way ANOVA            | DSS x Vagotomy<br>F <sub>(1,42)</sub> = 16.21 | p < 0.001                  |  |  |  |
|        |           |                     | SDV-Bi     | WT        | H <sub>2</sub> O | Male                  | 10             | 16.00 (12.78, 19.15)     |                          |                                               |                            |  |  |  |
|        |           |                     | Sham       | WT        | DSS              | Male                  | 13             | 4.55 (3.50, 5.48)        |                          |                                               |                            |  |  |  |
|        |           |                     | <b>V-L</b> | <b>WT</b> | <b>DSS</b>       | <b>Male</b>           | <b>13</b>      | <b>6.40 (4.40, 9.85)</b> |                          |                                               |                            |  |  |  |

| Figure | Parameter | Test specifications | Genotype      | Treatment | Sex              | Number of individuals | Median (Q1,Q3) | Statistical test                                   | Compared Groups                                   | p = value                              |           |
|--------|-----------|---------------------|---------------|-----------|------------------|-----------------------|----------------|----------------------------------------------------|---------------------------------------------------|----------------------------------------|-----------|
| Fig.3H | EPM       | total distance (m)  |               |           |                  |                       |                | Two-way ANOVA<br>Tukey's Multiple Comparisons test | H <sub>2</sub> O Sham vs. H <sub>2</sub> O GV-Bi  | p = 0.964                              |           |
|        |           |                     | Sham          | WT        | H <sub>2</sub> O | Male                  | 10             |                                                    | 12.50 (8.75, 15.25)                               | H <sub>2</sub> O Sham vs. DSS Sham     | p < 0.001 |
|        |           |                     | GV-Bi         | WT        | H <sub>2</sub> O | Male                  | 10             |                                                    | 10.50 (7.75, 15.00)                               | H <sub>2</sub> O Sham vs. DSS GV-Bi    | p = 0.028 |
|        |           |                     | Sham          | WT        | DSS              | Male                  | 13             |                                                    | 3.00 (2.00, 5.50)                                 | H <sub>2</sub> O GV-Bi vs. DSS Sham    | p < 0.001 |
|        |           |                     | <b>GV-Bi</b>  | <b>WT</b> | <b>DSS</b>       | <b>Male</b>           | <b>14</b>      |                                                    | <b>6.00 (4.75, 12.00)</b>                         | H <sub>2</sub> O GV-Bi vs. DSS GV-Bi   | p = 0.007 |
|        |           |                     |               |           |                  |                       |                |                                                    |                                                   | DSS Sham vs. DSS GV-Bi                 | p = 0.002 |
| Fig.3H | EPM       | total distance (m)  |               |           |                  |                       |                | Two-way ANOVA<br>Tukey's Multiple Comparisons test | H <sub>2</sub> O Sham vs. H <sub>2</sub> O SDV-Bi | p = 0.006                              |           |
|        |           |                     | Sham          | WT        | H <sub>2</sub> O | Male                  | 10             |                                                    | 14.75 (12.28, 17.15)                              | H <sub>2</sub> O Sham vs. DSS Sham     | p < 0.001 |
|        |           |                     | SDV-Bi        | WT        | H <sub>2</sub> O | Male                  | 10             |                                                    | 16.00 (12.78, 19.15)                              | H <sub>2</sub> O Sham vs. DSS SDV-Bi   | p < 0.001 |
|        |           |                     | Sham          | WT        | DSS              | Male                  | 13             |                                                    | 4.55 (3.50, 5.48)                                 | H <sub>2</sub> O SDV-Bi vs. DSS Sham   | p < 0.001 |
|        |           |                     | <b>SDV-Bi</b> | <b>WT</b> | <b>DSS</b>       | <b>Male</b>           | <b>13</b>      |                                                    | <b>4.90 (3.35, 7.10)</b>                          | H <sub>2</sub> O SDV-Bi vs. DSS SDV-Bi | p = 0.007 |
|        |           |                     |               |           |                  |                       |                |                                                    |                                                   | DSS Sham vs. DSS SDV-Bi                | p = 0.800 |
| Fig.3H | EPM       | total distance (m)  |               |           |                  |                       |                | Two-way ANOVA<br>Tukey's Multiple Comparisons test | H <sub>2</sub> O Sham vs. H <sub>2</sub> O SDV-Bi | p < 0.001                              |           |
|        |           |                     | Sham          | WT        | H <sub>2</sub> O | Male                  | 10             |                                                    | 14.75 (12.28, 17.15)                              | H <sub>2</sub> O Sham vs. DSS Sham     | p < 0.001 |
|        |           |                     | SDV-Bi        | WT        | H <sub>2</sub> O | Male                  | 10             |                                                    | 16.00 (12.78, 19.15)                              | H <sub>2</sub> O Sham vs. DSS SDV-R    | p < 0.001 |
|        |           |                     | Sham          | WT        | DSS              | Male                  | 13             |                                                    | 4.55 (3.50, 5.48)                                 | H <sub>2</sub> O SDV-Bi vs. DSS Sham   | p < 0.001 |
|        |           |                     | <b>SDV-R</b>  | <b>WT</b> | <b>DSS</b>       | <b>Male</b>           | <b>12</b>      |                                                    | <b>4.55 (3.93, 6.15)</b>                          | H <sub>2</sub> O SDV-Bi vs. DSS SDV-R  | p < 0.001 |
|        |           |                     |               |           |                  |                       |                |                                                    |                                                   | DSS Sham vs. DSS SDV-R                 | p > 0.999 |
| Fig.3H | EPM       | total distance (m)  |               |           |                  |                       |                | Two-way ANOVA<br>Tukey's Multiple Comparisons test | H <sub>2</sub> O Sham vs. H <sub>2</sub> O SDV-Bi | p = 0.002                              |           |
|        |           |                     | Sham          | WT        | H <sub>2</sub> O | Male                  | 10             |                                                    | 14.75 (12.28, 17.15)                              | H <sub>2</sub> O Sham vs. DSS Sham     | p < 0.001 |
|        |           |                     | SDV-Bi        | WT        | H <sub>2</sub> O | Male                  | 10             |                                                    | 16.00 (12.78, 19.15)                              | H <sub>2</sub> O Sham vs. DSS V-L      | p < 0.001 |
|        |           |                     | Sham          | WT        | DSS              | Male                  | 13             |                                                    | 4.55 (3.50, 5.48)                                 | H <sub>2</sub> O SDV-Bi vs. DSS Sham   | p < 0.001 |
|        |           |                     | <b>V-L</b>    | <b>WT</b> | <b>DSS</b>       | <b>Male</b>           | <b>13</b>      |                                                    | <b>6.40 (4.40, 9.85)</b>                          | H <sub>2</sub> O SDV-Bi vs. DSS V-L    | p = 0.022 |
|        |           |                     |               |           |                  |                       |                |                                                    |                                                   | DSS Sham vs. DSS V-L                   | p = 0.308 |

| Figure | Parameter |                 | Test specifications | Genotype | Treatment        | Sex  | Number of individuals | Median (Q1,Q3)     | Statistical test    | t-distribution t, df | p = value |
|--------|-----------|-----------------|---------------------|----------|------------------|------|-----------------------|--------------------|---------------------|----------------------|-----------|
| Fig.3I | EPM       | open arms (sec) | Sham                | WT       | H <sub>2</sub> O | Male | 10                    | 6.05 (2.33, 15.58) | Mann-Whitney U test | -                    | p = 0.003 |
|        |           |                 | Sham                | WT       | DSS              | Male | 13                    | 0.40 (0.00, 1.30)  |                     |                      |           |

| Figure | Parameter |                 | Test specifications | Genotype  | Treatment        | Sex         | Number of individuals | Median (Q1,Q3)             | Statistical test | Fixed effects F(DFn,DFd)                      | p = value |
|--------|-----------|-----------------|---------------------|-----------|------------------|-------------|-----------------------|----------------------------|------------------|-----------------------------------------------|-----------|
| Fig.3I | EPM       | open arms (sec) | Sham                | WT        | H <sub>2</sub> O | Male        | 10                    | 6.05 (2.33, 15.58)         | Two-way ANOVA    | DSS x Vagotomy<br>F <sub>(1,43)</sub> = 11.90 | p = 0.001 |
|        |           |                 | GV-Bi               | WT        | H <sub>2</sub> O | Male        | 10                    | 6.25 (1.55, 12.68)         |                  |                                               |           |
|        |           |                 | Sham                | WT        | DSS              | Male        | 13                    | 0.40 (0.00, 1.30)          |                  |                                               |           |
|        |           |                 | <b>GV-Bi</b>        | <b>WT</b> | <b>DSS</b>       | <b>Male</b> | <b>14</b>             | <b>10.08 (2.08, 24.25)</b> |                  |                                               |           |
|        |           |                 | Sham                | WT        | H <sub>2</sub> O | Male        | 10                    | 6.05 (2.33, 15.58)         | Two-way ANOVA    | DSS x Vagotomy<br>F <sub>(1,42)</sub> = 3.90  | p = 0.055 |
|        |           |                 | GV-Bi               | WT        | H <sub>2</sub> O | Male        | 10                    | 6.25 (1.55, 12.68)         |                  |                                               |           |
|        |           |                 | Sham                | WT        | DSS              | Male        | 13                    | 0.40 (0.00, 1.30)          |                  |                                               |           |
|        |           |                 | <b>GV-R</b>         | <b>WT</b> | <b>DSS</b>       | <b>Male</b> | <b>13</b>             | <b>0.40 (0.00, 5.85)</b>   |                  |                                               |           |
|        |           |                 | Sham                | WT        | H <sub>2</sub> O | Male        | 10                    | 6.05 (2.33, 15.58)         | Two-way ANOVA    | DSS x Vagotomy<br>F <sub>(1,42)</sub> = 4.31  | p = 0.044 |
|        |           |                 | GV-Bi               | WT        | H <sub>2</sub> O | Male        | 10                    | 6.25 (1.55, 12.68)         |                  |                                               |           |
|        |           |                 | Sham                | WT        | DSS              | Male        | 13                    | 0.40 (0.00, 1.30)          |                  |                                               |           |
|        |           |                 | <b>V-L</b>          | <b>WT</b> | <b>DSS</b>       | <b>Male</b> | <b>13</b>             | <b>1.00 (0.10, 7.50)</b>   |                  |                                               |           |
| Fig.3I | EPM       | open arms (sec) | Sham                | WT        | H <sub>2</sub> O | Male        | 10                    | 6.05 (2.33, 15.58)         | Two-way ANOVA    | DSS x Vagotomy<br>F <sub>(1,43)</sub> = 6.57  | p = 0.014 |
|        |           |                 | SDV-Bi              | WT        | H <sub>2</sub> O | Male        | 10                    | 9.05 (4.15, 12.50)         |                  |                                               |           |
|        |           |                 | Sham                | WT        | DSS              | Male        | 13                    | 0.40 (0.00, 1.30)          |                  |                                               |           |
|        |           |                 | <b>SDV-Bi</b>       | <b>WT</b> | <b>DSS</b>       | <b>Male</b> | <b>13</b>             | <b>5.20 (1.45, 12.85)</b>  |                  |                                               |           |
|        |           |                 | Sham                | WT        | H <sub>2</sub> O | Male        | 10                    | 6.05 (2.33, 15.58)         | Two-way ANOVA    | DSS x Vagotomy<br>F <sub>(1,41)</sub> = 1.93  | p = 0.172 |
|        |           |                 | SDV-Bi              | WT        | H <sub>2</sub> O | Male        | 10                    | 9.05 (4.15, 12.50)         |                  |                                               |           |
|        |           |                 | Sham                | WT        | DSS              | Male        | 13                    | 0.40 (0.00, 1.30)          |                  |                                               |           |
|        |           |                 | <b>SDV-R</b>        | <b>WT</b> | <b>DSS</b>       | <b>Male</b> | <b>12</b>             | <b>0.75 (0.03, 2.15)</b>   |                  |                                               |           |
|        |           |                 | Sham                | WT        | H <sub>2</sub> O | Male        | 10                    | 6.05 (2.33, 15.58)         | Two-way ANOVA    | DSS x Vagotomy<br>F <sub>(1,42)</sub> = 4.03  | p = 0.051 |
|        |           |                 | SDV-Bi              | WT        | H <sub>2</sub> O | Male        | 10                    | 9.05 (4.15, 12.50)         |                  |                                               |           |
|        |           |                 | Sham                | WT        | DSS              | Male        | 13                    | 0.40 (0.00, 1.30)          |                  |                                               |           |
|        |           |                 | <b>V-L</b>          | <b>WT</b> | <b>DSS</b>       | <b>Male</b> | <b>13</b>             | <b>1.00 (0.10, 7.50)</b>   |                  |                                               |           |

| Figure | Parameter |                 | Test specifications | Genotype  | Treatment        | Sex         | Number of individuals | Median (Q1,Q3)             | Statistical test                                   | Compared Groups                                  | p = value |
|--------|-----------|-----------------|---------------------|-----------|------------------|-------------|-----------------------|----------------------------|----------------------------------------------------|--------------------------------------------------|-----------|
| Fig.3I | EPM       | open arms (sec) |                     |           |                  |             |                       |                            | Two-way ANOVA<br>Tukey's Multiple Comparisons test | H <sub>2</sub> O Sham vs. H <sub>2</sub> O GV-Bi | p = 0.741 |
|        |           |                 | Sham                | WT        | H <sub>2</sub> O | Male        | 10                    | 6.05 (2.33, 15.58)         |                                                    | H <sub>2</sub> O Sham vs. DSS Sham               | p = 0.009 |
|        |           |                 | GV-Bi               | WT        | H <sub>2</sub> O | Male        | 10                    | 6.25 (1.55, 12.68)         |                                                    | H <sub>2</sub> O Sham vs. DSS GV-Bi              | p = 0.977 |
|        |           |                 | Sham                | WT        | DSS              | Male        | 13                    | 0.40 (0.00, 1.30)          |                                                    | H <sub>2</sub> O GV-Bi vs. DSS Sham              | p = 0.119 |
|        |           |                 | <b>GV-Bi</b>        | <b>WT</b> | <b>DSS</b>       | <b>Male</b> | <b>14</b>             | <b>10.08 (2.08, 24.25)</b> |                                                    | H <sub>2</sub> O GV-Bi vs. DSS GV-Bi             | p = 0.443 |
|        |           |                 |                     |           |                  |             |                       |                            |                                                    | DSS Sham vs. DSS GV-Bi                           | p = 0.001 |
| Fig.3I | EPM       | open arms (sec) |                     |           |                  |             |                       |                            | Two-way ANOVA<br>Tukey's Multiple Comparisons test | H <sub>2</sub> O Sham vs. H <sub>2</sub> O GV-Bi | p = 0.423 |
|        |           |                 | Sham                | WT        | H <sub>2</sub> O | Male        | 10                    | 6.05 (2.33, 15.58)         |                                                    | H <sub>2</sub> O Sham vs. DSS Sham               | p < 0.001 |
|        |           |                 | GV-Bi               | WT        | H <sub>2</sub> O | Male        | 10                    | 6.25 (1.55, 12.68)         |                                                    | H <sub>2</sub> O Sham vs. DSS V-L                | p = 0.003 |
|        |           |                 | Sham                | WT        | DSS              | Male        | 13                    | 0.40 (0.00, 1.30)          |                                                    | H <sub>2</sub> O GV-Bi vs. DSS Sham              | p = 0.007 |
|        |           |                 | <b>V-L</b>          | <b>WT</b> | <b>DSS</b>       | <b>Male</b> | <b>13</b>             | <b>1.00 (0.10, 7.50)</b>   |                                                    | H <sub>2</sub> O GV-Bi vs. DSS V-L               | p = 0.152 |
|        |           |                 |                     |           |                  |             |                       |                            |                                                    | DSS Sham vs. DSS V-L                             | p = 0.512 |
| Fig.3I | EPM       | open arms (sec) |                     |           |                  |             |                       |                            | Two-way ANOVA<br>Tukey's Multiple Comparisons test | H <sub>2</sub> O Sham vs. H <sub>2</sub> O SV-Bi | p = 0.860 |
|        |           |                 | Sham                | WT        | H <sub>2</sub> O | Male        | 10                    | 6.05 (2.33, 15.58)         |                                                    | H <sub>2</sub> O Sham vs. DSS Sham               | p = 0.021 |
|        |           |                 | SDV-Bi              | WT        | H <sub>2</sub> O | Male        | 10                    | 9.05 (4.15, 12.50)         |                                                    | H <sub>2</sub> O Sham vs. DSS SDV-Bi             | p = 0.993 |
|        |           |                 | Sham                | WT        | DSS              | Male        | 13                    | 0.40 (0.00, 1.30)          |                                                    | H <sub>2</sub> O SDV-Bi vs. DSS Sham             | p = 0.142 |
|        |           |                 | <b>SDV-Bi</b>       | <b>WT</b> | <b>DSS</b>       | <b>Male</b> | <b>13</b>             | <b>5.20 (1.45, 12.85)</b>  |                                                    | H <sub>2</sub> O SDV-Bi vs. DSS SDV-Bi           | p = 0.938 |
|        |           |                 |                     |           |                  |             |                       |                            |                                                    | DSS Sham vs. DSS SDV-Bi                          | p = 0.022 |

| Figure | Parameter |                   | Test specifications | Genotype | Treatment        | Sex  | Number of individuals | Median (Q1,Q3)       | Statistical test                     | t-distribution t, df     | p = value |
|--------|-----------|-------------------|---------------------|----------|------------------|------|-----------------------|----------------------|--------------------------------------|--------------------------|-----------|
| Fig.3J | EPM       | closed arms (sec) | Sham                | WT       | H <sub>2</sub> O | Male | 10                    | 79.00 (66.95, 88.78) | Two-tailed unpaired Student's t-test | t <sub>(21)</sub> = 4.74 | p < 0.001 |
|        |           |                   | Sham                | WT       | DSS              | Male | 13                    | 96.00 (90.95, 99.30) |                                      |                          |           |

| Figure | Parameter |                   | Test specifications | Genotype   | Treatment            | Sex       | Number of individuals       | Median (Q1,Q3)       | Statistical test | Fixed effects F(DFn,DFd)                      | p = value |  |  |
|--------|-----------|-------------------|---------------------|------------|----------------------|-----------|-----------------------------|----------------------|------------------|-----------------------------------------------|-----------|--|--|
| Fig.3J | EPM       | closed arms (sec) | Sham                | WT         | H <sub>2</sub> O     | Male      | 10                          | 79.00 (66.95, 86.78) | Two-way ANOVA    | DSS x Vagotomy<br>F <sub>(1,43)</sub> = 10.22 | p = 0.003 |  |  |
|        |           |                   | GV-Bi               | WT         | H <sub>2</sub> O     | Male      | 10                          | 72.00 (60.83, 82.48) |                  |                                               |           |  |  |
|        |           |                   | Sham                | WT         | DSS                  | Male      | 13                          | 96.00 (90.95, 99.30) |                  |                                               |           |  |  |
|        |           |                   |                     |            | <b>GV-Bi</b>         | <b>WT</b> | <b>DSS</b>                  | <b>Male</b>          | <b>14</b>        | <b>80.35 (62.70, 89.93)</b>                   |           |  |  |
|        |           |                   | Sham                | WT         | H <sub>2</sub> O     | Male      | 10                          | 79.00 (66.95, 86.78) | Two-way ANOVA    | DSS x Vagotomy<br>F <sub>(1,42)</sub> = 2.58  | p = 0.116 |  |  |
|        |           |                   | GV-Bi               | WT         | H <sub>2</sub> O     | Male      | 10                          | 72.00 (60.83, 82.48) |                  |                                               |           |  |  |
|        |           |                   | Sham                | WT         | DSS                  | Male      | 13                          | 96.00 (90.95, 99.30) |                  |                                               |           |  |  |
|        |           |                   |                     |            | <b>GV-R</b>          | <b>WT</b> | <b>DSS</b>                  | <b>Male</b>          | <b>13</b>        | <b>91.00 (82.85, 98.40)</b>                   |           |  |  |
|        |           |                   | Sham                | WT         | H <sub>2</sub> O     | Male      | 10                          | 79.00 (66.95, 86.78) | Two-way ANOVA    | DSS x Vagotomy<br>F <sub>(1,42)</sub> = 2.66  | p = 0.110 |  |  |
|        |           |                   | GV-Bi               | WT         | H <sub>2</sub> O     | Male      | 10                          | 72.00 (60.83, 82.48) |                  |                                               |           |  |  |
| Sham   | WT        | DSS               | Male                | 13         | 96.00 (90.95, 99.30) |           |                             |                      |                  |                                               |           |  |  |
|        |           | <b>V-L</b>        | <b>WT</b>           | <b>DSS</b> | <b>Male</b>          | <b>13</b> | <b>93.90 (79.35, 96.10)</b> |                      |                  |                                               |           |  |  |
| Fig.3J | EPM       | closed arms (sec) | Sham                | WT         | H <sub>2</sub> O     | Male      | 10                          | 79.00 (66.95, 86.78) | Two-way ANOVA    | DSS x Vagotomy<br>F <sub>(1,43)</sub> = 14.16 | p < 0.001 |  |  |
|        |           |                   | SDV-Bi              | WT         | H <sub>2</sub> O     | Male      | 10                          | 78.25 (72.25, 84.75) |                  |                                               |           |  |  |
|        |           |                   | Sham                | WT         | DSS                  | Male      | 13                          | 96.00 (90.95, 99.30) |                  |                                               |           |  |  |
|        |           |                   |                     |            | <b>SDV-Bi</b>        | <b>WT</b> | <b>DSS</b>                  | <b>Male</b>          | <b>13</b>        | <b>89.20 (74.90, 93.80)</b>                   |           |  |  |
|        |           |                   | Sham                | WT         | H <sub>2</sub> O     | Male      | 10                          | 79.00 (66.95, 86.78) | Two-way ANOVA    | DSS x Vagotomy<br>F <sub>(1,41)</sub> = 6.31  | p = 0.016 |  |  |
|        |           |                   | SDV-Bi              | WT         | H <sub>2</sub> O     | Male      | 10                          | 78.25 (72.25, 84.75) |                  |                                               |           |  |  |
|        |           |                   | Sham                | WT         | DSS                  | Male      | 13                          | 96.00 (90.95, 99.30) |                  |                                               |           |  |  |
|        |           |                   |                     |            | <b>SDV-R</b>         | <b>WT</b> | <b>DSS</b>                  | <b>Male</b>          | <b>12</b>        | <b>92.95 (90.13, 96.35)</b>                   |           |  |  |
|        |           |                   | Sham                | WT         | H <sub>2</sub> O     | Male      | 10                          | 79.00 (66.95, 86.78) | Two-way ANOVA    | DSS x Vagotomy<br>F <sub>(1,42)</sub> = 9.14  | p = 0.004 |  |  |
|        |           |                   | SDV-Bi              | WT         | H <sub>2</sub> O     | Male      | 10                          | 78.25 (72.25, 84.75) |                  |                                               |           |  |  |
| Sham   | WT        | DSS               | Male                | 13         | 96.00 (90.95, 99.30) |           |                             |                      |                  |                                               |           |  |  |
|        |           | <b>V-L</b>        | <b>WT</b>           | <b>DSS</b> | <b>Male</b>          | <b>13</b> | <b>93.90 (79.35, 96.10)</b> |                      |                  |                                               |           |  |  |

| Figure | Parameter |                   | Test specifications | Genotype  | Treatment        | Sex         | Number of individuals | Median (Q1,Q3)              | Statistical test                                   | Compared Groups                                   | p = value |
|--------|-----------|-------------------|---------------------|-----------|------------------|-------------|-----------------------|-----------------------------|----------------------------------------------------|---------------------------------------------------|-----------|
| Fig.3J | EPM       | closed arms (sec) |                     |           |                  |             |                       |                             | Two-way ANOVA<br>Tukey's Multiple Comparisons test | H <sub>2</sub> O Sham vs. H <sub>2</sub> O GV-Bi  | p = 0.906 |
|        |           |                   | Sham                | WT        | H <sub>2</sub> O | Male        | 10                    | 79.00 (66.95, 86.78)        |                                                    | H <sub>2</sub> O Sham vs. DSS Sham                | p < 0.001 |
|        |           |                   | GV-Bi               | WT        | H <sub>2</sub> O | Male        | 10                    | 72.00 (60.83, 82.48)        |                                                    | H <sub>2</sub> O Sham vs. DSS GV-Bi               | p = 0.472 |
|        |           |                   | Sham                | WT        | DSS              | Male        | 13                    | 96.00 (90.95, 99.30)        |                                                    | H <sub>2</sub> O GV-Bi vs. DSS Sham               | p < 0.001 |
|        |           |                   | <b>GV-Bi</b>        | <b>WT</b> | <b>DSS</b>       | <b>Male</b> | <b>14</b>             | <b>80.35 (62.70, 89.93)</b> |                                                    | H <sub>2</sub> O GV-Bi vs. DSS GV-Bi              | p = 0.886 |
|        |           |                   |                     |           |                  |             |                       |                             |                                                    | DSS Sham vs. DSS GV-Bi                            | p = 0.001 |
| Fig.3J | EPM       | closed arms (sec) |                     |           |                  |             |                       |                             | Two-way ANOVA<br>Tukey's Multiple Comparisons test | H <sub>2</sub> O Sham vs. H <sub>2</sub> O SDV-Bi | p = 0.157 |
|        |           |                   | Sham                | WT        | H <sub>2</sub> O | Male        | 10                    | 79.00 (66.95, 86.78)        |                                                    | H <sub>2</sub> O Sham vs. DSS Sham                | p < 0.001 |
|        |           |                   | SDV-Bi              | WT        | H <sub>2</sub> O | Male        | 10                    | 78.25 (72.25, 84.75)        |                                                    | H <sub>2</sub> O Sham vs. DSS SDV-Bi              | p = 0.046 |
|        |           |                   | Sham                | WT        | DSS              | Male        | 13                    | 96.00 (90.95, 99.30)        |                                                    | H <sub>2</sub> O SDV-Bi vs. DSS Sham              | p = 0.008 |
|        |           |                   | <b>SDV-Bi</b>       | <b>WT</b> | <b>DSS</b>       | <b>Male</b> | <b>13</b>             | <b>89.20 (74.90, 93.80)</b> |                                                    | H <sub>2</sub> O SDV-Bi vs. DSS SDV-Bi            | p = 0.979 |
|        |           |                   |                     |           |                  |             |                       |                             |                                                    | DSS Sham vs. DSS SDV-Bi                           | p = 0.011 |
| Fig.3J | EPM       | closed arms (sec) |                     |           |                  |             |                       |                             | Two-way ANOVA<br>Tukey's Multiple Comparisons test | H <sub>2</sub> O Sham vs. H <sub>2</sub> O SDV-Bi | p = 0.025 |
|        |           |                   | Sham                | WT        | H <sub>2</sub> O | Male        | 10                    | 79.00 (66.95, 86.78)        |                                                    | H <sub>2</sub> O Sham vs. DSS Sham                | p < 0.001 |
|        |           |                   | SDV-Bi              | WT        | H <sub>2</sub> O | Male        | 10                    | 78.25 (72.25, 84.75)        |                                                    | H <sub>2</sub> O Sham vs. DSS SDV-R               | p < 0.001 |
|        |           |                   | Sham                | WT        | DSS              | Male        | 13                    | 96.00 (90.95, 99.30)        |                                                    | H <sub>2</sub> O SDV-Bi vs. DSS Sham              | p < 0.001 |
|        |           |                   | <b>SDV-R</b>        | <b>WT</b> | <b>DSS</b>       | <b>Male</b> | <b>12</b>             | <b>92.95 (90.13, 96.35)</b> |                                                    | H <sub>2</sub> O SDV-Bi vs. DSS SDV-R             | p < 0.001 |
|        |           |                   |                     |           |                  |             |                       |                             |                                                    | DSS Sham vs. DSS SDV-R                            | p = 0.969 |



| Figure | Parameter |                   | Test specifications | Genotype | Treatment        | Sex  | Number of individuals | Median (Q1,Q3)       | Statistical test                                   | Compared Groups                                  | p = value            |
|--------|-----------|-------------------|---------------------|----------|------------------|------|-----------------------|----------------------|----------------------------------------------------|--------------------------------------------------|----------------------|
| Fig.3J | EPM       | closed arms (sec) |                     |          |                  |      |                       |                      | Two-way ANOVA<br>Tukey's Multiple Comparisons test | H <sub>2</sub> O Sham vs. H <sub>2</sub> O SV-Bi | p = 0.069            |
|        |           |                   | Sham                | WT       | H <sub>2</sub> O | Male | 10                    | 79.00 (66.95, 86.78) |                                                    | H <sub>2</sub> O Sham vs. DSS Sham               | p < 0.001            |
|        |           |                   | SDV-Bi              | WT       | H <sub>2</sub> O | Male | 10                    | 78.25 (72.25, 84.75) |                                                    | H <sub>2</sub> O Sham vs. DSS V-L                | p < 0.001            |
|        |           |                   | Sham                | WT       | DSS              | Male | 13                    | 96.00 (90.95, 99.30) |                                                    | H <sub>2</sub> O SDV-Bi vs. DSS Sham             | p = 0.001            |
|        |           |                   | V-L                 | WT       | DSS              | Male | 13                    | 93.90 (79.35, 96.10) |                                                    | H <sub>2</sub> O SDV-Bi vs. DSS V-L              | p = 0.084            |
|        |           |                   |                     |          |                  |      |                       |                      |                                                    |                                                  | DSS Sham vs. DSS V-L |

| Figure | Parameter       |  | Test specifications | Genotype | Treatment | Sex  | Number of individuals | Mean ± SEM  | Statistical test             | Dunnett's test           | p = value |
|--------|-----------------|--|---------------------|----------|-----------|------|-----------------------|-------------|------------------------------|--------------------------|-----------|
| Fig.4C | Food intake (g) |  | SAP-Blank           | WT       | -         | Male | 21                    | 0.59 ± 0.04 | One-way ANOVA<br>(p = 0.016) | -                        | -         |
|        |                 |  | CCK-SAP-Bi          | WT       | -         | Male | 21                    | 0.80 ± 0.05 |                              | SAP-Blank vs. CCK-SAP-Bi | p = 0.001 |
|        |                 |  | CCK-SAP-R           | WT       | -         | Male | 10                    | 0.79 ± 0.05 |                              | SAP-Blank vs. CCK-SAP-R  | p = 0.015 |
|        |                 |  | CCK-SAP-L           | WT       | -         | Male | 10                    | 0.76 ± 0.03 |                              | SAP-Blank vs. CCK-SAP-L  | p = 0.045 |

| Figure | Parameter |                    | Test specifications | Genotype | Treatment        | Sex  | Number of individuals | Median (Q1,Q3)       | Statistical test                     | t-distribution t, df     | p = value |
|--------|-----------|--------------------|---------------------|----------|------------------|------|-----------------------|----------------------|--------------------------------------|--------------------------|-----------|
| Fig.4D | OFT       | total distance (m) | SAP-Blank           | WT       | H <sub>2</sub> O | Male | 9                     | 33.90 (28.65, 36.55) | Two-tailed unpaired Student's t-test | t <sub>(19)</sub> = 5.19 | p < 0.001 |
|        |           |                    | SAP-Blank           | WT       | DSS              | Male | 12                    | 18.15 (13.38, 25.73) |                                      |                          |           |

| Figure | Parameter |                    | Test specifications | Genotype  | Treatment        | Sex         | Number of individuals | Median (Q1,Q3)              | Statistical test | Fixed effects F(DFn,DFd)                           | p = value |
|--------|-----------|--------------------|---------------------|-----------|------------------|-------------|-----------------------|-----------------------------|------------------|----------------------------------------------------|-----------|
| Fig.4D | OFT       | total distance (m) | SAP-Blank           | WT        | H <sub>2</sub> O | Male        | 9                     | 33.90 (28.65, 36.55)        | Two-way ANOVA    | DSS x Nodose CCK-SAP<br>F <sub>(1,38)</sub> = 0.28 | p = 0.603 |
|        |           |                    | CCK-SAP-Bi          | WT        | H <sub>2</sub> O | Male        | 9                     | 34.10 (30.10, 40.95)        |                  |                                                    |           |
|        |           |                    | SAP-Blank           | WT        | DSS              | Male        | 12                    | 18.15 (13.38, 25.73)        |                  |                                                    |           |
|        |           |                    | <b>CCK-SAP</b>      | <b>WT</b> | <b>DSS</b>       | <b>Male</b> | <b>12</b>             | <b>16.85 (12.90, 21.45)</b> |                  |                                                    |           |
|        |           |                    | SAP-Blank           | WT        | H <sub>2</sub> O | Male        | 9                     | 33.90 (28.65, 36.55)        | Two-way ANOVA    | DSS x Nodose CCK-SAP<br>F <sub>(1,36)</sub> = 0.10 | p = 0.750 |
|        |           |                    | CCK-SAP-Bi          | WT        | H <sub>2</sub> O | Male        | 9                     | 34.10 (30.10, 40.95)        |                  |                                                    |           |
|        |           |                    | SAP-Blank           | WT        | DSS              | Male        | 12                    | 18.15 (13.38, 25.73)        |                  |                                                    |           |
|        |           |                    | <b>CCK-SAP-R</b>    | <b>WT</b> | <b>DSS</b>       | <b>Male</b> | <b>10</b>             | <b>18.15 (14.83, 20.90)</b> |                  |                                                    |           |
|        |           |                    | SAP-Blank           | WT        | H <sub>2</sub> O | Male        | 9                     | 33.90 (28.65, 36.55)        | Two-way ANOVA    | DSS x Nodose CCK-SAP<br>F <sub>(1,36)</sub> = 3.16 | p = 0.084 |
|        |           |                    | CCK-SAP-Bi          | WT        | H <sub>2</sub> O | Male        | 9                     | 34.10 (30.10, 40.95)        |                  |                                                    |           |
|        |           |                    | SAP-Blank           | WT        | DSS              | Male        | 12                    | 18.15 (13.38, 25.73)        |                  |                                                    |           |
|        |           |                    | <b>CCK-SAP-L</b>    | <b>WT</b> | <b>DSS</b>       | <b>Male</b> | <b>10</b>             | <b>12.00 (9.90, 16.33)</b>  |                  |                                                    |           |

| Figure | Parameter |                      | Test specifications | Genotype | Treatment        | Sex  | Number of individuals | Median (Q1,Q3)     | Statistical test                     | t-distribution t, df     | p = value |
|--------|-----------|----------------------|---------------------|----------|------------------|------|-----------------------|--------------------|--------------------------------------|--------------------------|-----------|
| Fig.4E | OFT       | time in center (sec) | SAP-Blank           | WT       | H <sub>2</sub> O | Male | 9                     | 9.10 (4.60, 15.95) | Two-tailed unpaired Student's t-test | t <sub>(19)</sub> = 4.27 | p < 0.001 |
|        |           |                      | SAP-Blank           | WT       | DSS              | Male | 12                    | 1.80 (0.60, 3.98)  |                                      |                          |           |

| Figure | Parameter |                      | Test specifications | Genotype  | Treatment        | Sex         | Number of individuals | Median (Q1,Q3)           | Statistical test | Fixed effects F(DFn,DFd)                           | p = value |
|--------|-----------|----------------------|---------------------|-----------|------------------|-------------|-----------------------|--------------------------|------------------|----------------------------------------------------|-----------|
| Fig.4E | OFT       | time in center (sec) | SAP-Blank           | WT        | H <sub>2</sub> O | Male        | 9                     | 9.10 (4.60, 15.95)       | Two-way ANOVA    | DSS x Nodose CCK-SAP<br>F <sub>(1,38)</sub> = 2.68 | p = 0.110 |
|        |           |                      | CCK-SAP-Bi          | WT        | H <sub>2</sub> O | Male        | 9                     | 7.90 (6.25, 14.55)       |                  |                                                    |           |
|        |           |                      | SAP-Blank           | WT        | DSS              | Male        | 12                    | 1.80 (0.60, 3.98)        |                  |                                                    |           |
|        |           |                      | <b>CCK-SAP</b>      | <b>WT</b> | <b>DSS</b>       | <b>Male</b> | <b>12</b>             | <b>1.60 (0.60, 3.35)</b> |                  |                                                    |           |
|        |           |                      | SAP-Blank           | WT        | H <sub>2</sub> O | Male        | 9                     | 9.10 (4.60, 15.95)       | Two-way ANOVA    | DSS x Nodose CCK-SAP<br>F <sub>(1,36)</sub> = 2.55 | p = 0.119 |
|        |           |                      | CCK-SAP-Bi          | WT        | H <sub>2</sub> O | Male        | 9                     | 7.90 (6.25, 14.55)       |                  |                                                    |           |
|        |           |                      | SAP-Blank           | WT        | DSS              | Male        | 12                    | 1.80 (0.60, 3.98)        |                  |                                                    |           |
|        |           |                      | <b>CCK-SAP-R</b>    | <b>WT</b> | <b>DSS</b>       | <b>Male</b> | <b>10</b>             | <b>1.35 (0.38, 2.85)</b> |                  |                                                    |           |
|        |           |                      | SAP-Blank           | WT        | H <sub>2</sub> O | Male        | 9                     | 9.10 (4.60, 15.95)       | Two-way ANOVA    | DSS x Nodose CCK-SAP<br>F <sub>(1,36)</sub> = 2.59 | p = 0.116 |
|        |           |                      | CCK-SAP-Bi          | WT        | H <sub>2</sub> O | Male        | 9                     | 7.90 (6.25, 14.55)       |                  |                                                    |           |
|        |           |                      | SAP-Blank           | WT        | DSS              | Male        | 12                    | 1.80 (0.60, 3.98)        |                  |                                                    |           |
|        |           |                      | <b>CCK-SAP-L</b>    | <b>WT</b> | <b>DSS</b>       | <b>Male</b> | <b>10</b>             | <b>1.95 (0.55, 3.00)</b> |                  |                                                    |           |

| Figure | Parameter |                | Test specifications | Genotype | Treatment        | Sex  | Number of individuals | Median (Q1,Q3)       | Statistical test    | t-distribution t, df | p = value |
|--------|-----------|----------------|---------------------|----------|------------------|------|-----------------------|----------------------|---------------------|----------------------|-----------|
| Fig.4F | LDB       | duration (sec) | SAP-Blank           | WT       | H <sub>2</sub> O | Male | 9                     | 33.50 (22.90, 40.75) | Mann-Whitney U test | -                    | p < 0.001 |
|        |           |                | SAP-Blank           | WT       | DSS              | Male | 12                    | 3.90 (0.00, 9.50)    |                     |                      |           |

| Figure | Parameter |                | Test specifications | Genotype  | Treatment        | Sex         | Number of individuals | Median (Q1,Q3)              | Statistical test | Fixed effects F(DFn,DFd)                            | p = value |
|--------|-----------|----------------|---------------------|-----------|------------------|-------------|-----------------------|-----------------------------|------------------|-----------------------------------------------------|-----------|
| Fig.4F | LDB       | duration (sec) | SAP-Blank           | WT        | H <sub>2</sub> O | Male        | 9                     | 33.50 (22.90, 40.75)        | Two-way ANOVA    | DSS x Nodose CCK-SAP<br>F <sub>(1,38)</sub> = 35.09 | p < 0.001 |
|        |           |                | CCK-SAP-Bi          | WT        | H <sub>2</sub> O | Male        | 9                     | 36.30 (16.85, 39.10)        |                  |                                                     |           |
|        |           |                | SAP-Blank           | WT        | DSS              | Male        | 12                    | 3.90 (0.00, 9.50)           |                  |                                                     |           |
|        |           |                | <b>CCK-SAP</b>      | <b>WT</b> | <b>DSS</b>       | <b>Male</b> | <b>12</b>             | <b>42.60 (27.80, 50.38)</b> |                  |                                                     |           |
|        |           |                | SAP-Blank           | WT        | H <sub>2</sub> O | Male        | 9                     | 33.50 (22.90, 40.75)        | Two-way ANOVA    | DSS x Nodose CCK-SAP<br>F <sub>(1,36)</sub> = 2.31  | p = 0.137 |
|        |           |                | CCK-SAP-Bi          | WT        | H <sub>2</sub> O | Male        | 9                     | 36.30 (16.85, 39.10)        |                  |                                                     |           |
|        |           |                | SAP-Blank           | WT        | DSS              | Male        | 12                    | 3.90 (0.00, 9.50)           |                  |                                                     |           |
|        |           |                | <b>CCK-SAP-R</b>    | <b>WT</b> | <b>DSS</b>       | <b>Male</b> | <b>10</b>             | <b>9.50 (0.75, 18.75)</b>   |                  |                                                     |           |
|        |           |                | SAP-Blank           | WT        | H <sub>2</sub> O | Male        | 9                     | 33.50 (22.90, 40.75)        | Two-way ANOVA    | DSS x Nodose CCK-SAP<br>F <sub>(1,36)</sub> = 2.57  | p = 0.118 |
|        |           |                | CCK-SAP-Bi          | WT        | H <sub>2</sub> O | Male        | 9                     | 36.30 (16.85, 39.10)        |                  |                                                     |           |
|        |           |                | SAP-Blank           | WT        | DSS              | Male        | 12                    | 3.90 (0.00, 9.50)           |                  |                                                     |           |
|        |           |                | <b>CCK-SAP-L</b>    | <b>WT</b> | <b>DSS</b>       | <b>Male</b> | <b>10</b>             | <b>9.45 (0.53, 19.05)</b>   |                  |                                                     |           |

| Figure | Parameter |                | Test specifications | Genotype  | Treatment        | Sex         | Number of individuals | Median (Q1,Q3)              | Statistical test                                   | Compared Groups                                     | p = value                 |           |
|--------|-----------|----------------|---------------------|-----------|------------------|-------------|-----------------------|-----------------------------|----------------------------------------------------|-----------------------------------------------------|---------------------------|-----------|
| Fig.4F | LDB       | duration (sec) |                     |           |                  |             |                       |                             | Two-way ANOVA<br>Tukey's Multiple Comparisons test | H <sub>2</sub> O SAP-B vs. H <sub>2</sub> O CCK-SAP | p = 0.841                 |           |
|        |           |                | SAP-Blank           | WT        | H <sub>2</sub> O | Male        | 9                     | 33.50 (22.90, 40.75)        |                                                    | H <sub>2</sub> O SAP-B vs. DSS SAP-B                | p < 0.001                 |           |
|        |           |                | CCK-SAP-Bi          | WT        | H <sub>2</sub> O | Male        | 9                     | 36.30 (16.85, 39.10)        |                                                    | H <sub>2</sub> O SAP-B vs. DSS CCK-SAP              | p = 0.681                 |           |
|        |           |                | SAP-Blank           | WT        | DSS              | Male        | 12                    | 3.90 (0.00, 9.50)           |                                                    | H <sub>2</sub> O CCK-SAP vs. DSS SAP-B              | p < 0.001                 |           |
|        |           |                | <b>CCK-SAP</b>      | <b>WT</b> | <b>DSS</b>       | <b>Male</b> | <b>12</b>             | <b>42.60 (27.80, 50.38)</b> |                                                    | H <sub>2</sub> O CCK-SAP vs. DSS CCK-SAP            | p = 0.205                 |           |
|        |           |                |                     |           |                  |             |                       |                             |                                                    |                                                     | DSS SAP-B vs. DSS CCK-SAP | p < 0.001 |
|        |           |                |                     |           |                  |             |                       |                             |                                                    |                                                     |                           |           |

| Figure | Parameter |         | Test specifications | Genotype | Treatment        | Sex  | Number of individuals | Median (Q1,Q3)     | Statistical test                     | t-distribution t, df     | p = value |
|--------|-----------|---------|---------------------|----------|------------------|------|-----------------------|--------------------|--------------------------------------|--------------------------|-----------|
| Fig.4G | LDB       | entries | SAP-Blank           | WT       | H <sub>2</sub> O | Male | 9                     | 8.50 (3.00, 12.00) | Two-tailed unpaired Student's t-test | t <sub>(19)</sub> = 4.98 | p < 0.001 |
|        |           |         | SAP-Blank           | WT       | DSS              | Male | 12                    | 1.00 (0.00, 3.00)  |                                      |                          |           |

| Figure | Parameter |         | Test specifications | Genotype  | Treatment        | Sex         | Number of individuals | Median (Q1,Q3)            | Statistical test | Fixed effects F(DFn,DFd)                            | p = value |
|--------|-----------|---------|---------------------|-----------|------------------|-------------|-----------------------|---------------------------|------------------|-----------------------------------------------------|-----------|
| Fig.4G | LDB       | entries | SAP-Blank           | WT        | H <sub>2</sub> O | Male        | 9                     | 8.50 (3.00, 12.00)        | Two-way ANOVA    | DSS x Nodose CCK-SAP<br>F <sub>(1,38)</sub> = 8.53  | p = 0.006 |
|        |           |         | CCK-SAP-Bi          | WT        | H <sub>2</sub> O | Male        | 9                     | 7.00 (5.00, 11.00)        |                  |                                                     |           |
|        |           |         | SAP-Blank           | WT        | DSS              | Male        | 12                    | 1.00 (0.00, 3.00)         |                  |                                                     |           |
|        |           |         | <b>CCK-SAP</b>      | <b>WT</b> | <b>DSS</b>       | <b>Male</b> | <b>12</b>             | <b>8.00 (6.00, 10.00)</b> |                  |                                                     |           |
|        |           |         | SAP-Blank           | WT        | H <sub>2</sub> O | Male        | 9                     | 8.50 (3.00, 12.00)        | Two-way ANOVA    | DSS x Nodose CCK-SAP<br>F <sub>(1,36)</sub> = 0.004 | p = 0.948 |
|        |           |         | CCK-SAP-Bi          | WT        | H <sub>2</sub> O | Male        | 9                     | 7.00 (5.00, 11.00)        |                  |                                                     |           |
|        |           |         | SAP-Blank           | WT        | DSS              | Male        | 12                    | 1.00 (0.00, 3.00)         |                  |                                                     |           |
|        |           |         | <b>CCK-SAP-R</b>    | <b>WT</b> | <b>DSS</b>       | <b>Male</b> | <b>10</b>             | <b>0.75 (0.00, 2.50)</b>  |                  |                                                     |           |
|        |           |         | SAP-Blank           | WT        | H <sub>2</sub> O | Male        | 9                     | 8.50 (3.00, 12.00)        | Two-way ANOVA    | DSS x Nodose CCK-SAP<br>F <sub>(1,36)</sub> = 0.008 | p = 0.926 |
|        |           |         | CCK-SAP-Bi          | WT        | H <sub>2</sub> O | Male        | 9                     | 7.00 (5.00, 11.00)        |                  |                                                     |           |
|        |           |         | SAP-Blank           | WT        | DSS              | Male        | 12                    | 1.00 (0.00, 3.00)         |                  |                                                     |           |
|        |           |         | <b>CCK-SAP-L</b>    | <b>WT</b> | <b>DSS</b>       | <b>Male</b> | <b>10</b>             | <b>0.75 (0.00, 3.00)</b>  |                  |                                                     |           |

| Figure | Parameter |         | Test specifications | Genotype | Treatment        | Sex  | Number of individuals | Median (Q1,Q3)     | Statistical test                                   | Compared Groups                                     | p = value |
|--------|-----------|---------|---------------------|----------|------------------|------|-----------------------|--------------------|----------------------------------------------------|-----------------------------------------------------|-----------|
| Fig.4G | LDB       | entries |                     |          |                  |      |                       |                    | Two-way ANOVA<br>Tukey's Multiple Comparisons test | H <sub>2</sub> O SAP-B vs. H <sub>2</sub> O CCK-SAP | p = 0.995 |
|        |           |         | SAP-Blank           | WT       | H <sub>2</sub> O | Male | 9                     | 8.50 (3.00, 12.00) |                                                    | H <sub>2</sub> O SAP-B vs. DSS SAP-B                | p < 0.001 |
|        |           |         | CCK-SAP-Bi          | WT       | H <sub>2</sub> O | Male | 9                     | 7.00 (5.00, 11.00) |                                                    | H <sub>2</sub> O SAP-B vs. DSS CCK-SAP              | p = 0.722 |
|        |           |         | SAP-Blank           | WT       | DSS              | Male | 12                    | 1.00 (0.00, 3.00)  |                                                    | H <sub>2</sub> O CCK-SAP vs. DSS SAP-B              | p < 0.001 |
|        |           |         |                     |          |                  |      |                       |                    |                                                    |                                                     |           |

| Figure | Parameter |         | Test specifications | Genotype | Treatment | Sex  | Number of individuals | Median (Q1,Q3)     | Statistical test | Compared Groups                          | p = value |
|--------|-----------|---------|---------------------|----------|-----------|------|-----------------------|--------------------|------------------|------------------------------------------|-----------|
| Fig.4G | LDB       | entries | CCK-SAP             | WT       | DSS       | Male | 12                    | 8.00 (6.00, 10.00) |                  | H <sub>2</sub> O CCK-SAP vs. DSS CCK-SAP | p = 0.559 |
|        |           |         |                     |          |           |      |                       |                    |                  | DSS SAP-B vs. DSS CCK-SAP                | p < 0.001 |

| Figure | Parameter |                    | Test specifications | Genotype | Treatment        | Sex  | Number of individuals | Median (Q1,Q3)      | Statistical test                     | t-distribution t, df     | p = value |
|--------|-----------|--------------------|---------------------|----------|------------------|------|-----------------------|---------------------|--------------------------------------|--------------------------|-----------|
| Fig.4H | EPM       | total distance (m) | SAP-Blank           | WT       | H <sub>2</sub> O | Male | 9                     | 11.80 (9.30, 14.60) | Two-tailed unpaired Student's t-test | t <sub>(19)</sub> = 4.98 | p = 0.036 |
|        |           |                    | SAP-Blank           | WT       | DSS              | Male | 12                    | 8.65 (5.63, 10.45)  |                                      |                          |           |

| Figure    | Parameter |                    | Test specifications | Genotype | Treatment          | Sex  | Number of individuals | Median (Q1,Q3)       | Statistical test | Fixed effects F(DFn,DFd)                           | p = value |
|-----------|-----------|--------------------|---------------------|----------|--------------------|------|-----------------------|----------------------|------------------|----------------------------------------------------|-----------|
| Fig.4H    | EPM       | total distance (m) | SAP-Blank           | WT       | H <sub>2</sub> O   | Male | 9                     | 11.80 (9.30, 14.60)  | Two-way ANOVA    | DSS x Nodose CCK-SAP<br>F <sub>(1,38)</sub> = 1.71 | p = 0.198 |
|           |           |                    | CCK-SAP-Bi          | WT       | H <sub>2</sub> O   | Male | 9                     | 13.50 (10.50, 17.90) |                  |                                                    |           |
|           |           |                    | SAP-Blank           | WT       | DSS                | Male | 12                    | 8.65 (5.63, 10.45)   |                  |                                                    |           |
|           |           |                    | CCK-SAP             | WT       | DSS                | Male | 12                    | 12.45 (10.78, 19.38) | Two-way ANOVA    | DSS x Nodose CCK-SAP<br>F <sub>(1,36)</sub> = 3.72 | p = 0.062 |
|           |           |                    | SAP-Blank           | WT       | H <sub>2</sub> O   | Male | 9                     | 11.80 (9.30, 14.60)  |                  |                                                    |           |
|           |           |                    | CCK-SAP-Bi          | WT       | H <sub>2</sub> O   | Male | 9                     | 13.50 (10.50, 17.90) |                  |                                                    |           |
|           |           |                    | SAP-Blank           | WT       | DSS                | Male | 12                    | 8.65 (5.63, 10.45)   | Two-way ANOVA    | DSS x Nodose CCK-SAP<br>F <sub>(1,36)</sub> = 7.14 | p = 0.011 |
|           |           |                    | CCK-SAP-R           | WT       | DSS                | Male | 10                    | 4.30 (3.80, 6.28)    |                  |                                                    |           |
|           |           |                    | SAP-Blank           | WT       | H <sub>2</sub> O   | Male | 9                     | 11.80 (9.30, 14.60)  |                  |                                                    |           |
|           |           |                    | CCK-SAP-Bi          | WT       | H <sub>2</sub> O   | Male | 9                     | 13.50 (10.50, 17.90) |                  |                                                    |           |
| SAP-Blank | WT        | DSS                | Male                | 12       | 8.65 (5.63, 10.45) |      |                       |                      |                  |                                                    |           |
| CCK-SAP-L | WT        | DSS                | Male                | 10       | 4.15 (2.70, 5.43)  |      |                       |                      |                  |                                                    |           |

| Figure | Parameter |                 | Test specifications | Genotype | Treatment        | Sex  | Number of individuals | Median (Q1,Q3)    | Statistical test                     | t-distribution t, df     | p = value |
|--------|-----------|-----------------|---------------------|----------|------------------|------|-----------------------|-------------------|--------------------------------------|--------------------------|-----------|
| Fig.4I | EPM       | open arms (sec) | SAP-Blank           | WT       | H <sub>2</sub> O | Male | 9                     | 1.80 (0.05, 3.75) | Two-tailed unpaired Student's t-test | t <sub>(19)</sub> = 2.10 | p = 0.050 |
|        |           |                 | SAP-Blank           | WT       | DSS              | Male | 12                    | 0.40 (0.15, 0.75) |                                      |                          |           |

| Figure    | Parameter |                 | Test specifications | Genotype | Treatment         | Sex  | Number of individuals | Median (Q1,Q3)     | Statistical test | Fixed effects F(DFn,DFd)                            | p = value |
|-----------|-----------|-----------------|---------------------|----------|-------------------|------|-----------------------|--------------------|------------------|-----------------------------------------------------|-----------|
| Fig.4I    | EPM       | open arms (sec) | SAP-Blank           | WT       | H <sub>2</sub> O  | Male | 9                     | 1.80 (0.05, 3.75)  | Two-way ANOVA    | DSS x Nodose CCK-SAP<br>F <sub>(1,38)</sub> = 10.07 | p = 0.003 |
|           |           |                 | CCK-SAP-Bi          | WT       | H <sub>2</sub> O  | Male | 9                     | 2.40 (0.85, 8.50)  |                  |                                                     |           |
|           |           |                 | SAP-Blank           | WT       | DSS               | Male | 12                    | 0.40 (0.15, 0.75)  |                  |                                                     |           |
|           |           |                 | CCK-SAP             | WT       | DSS               | Male | 12                    | 8.15 (3.53, 12.68) | Two-way ANOVA    | DSS x Nodose CCK-SAP<br>F <sub>(1,36)</sub> = 1.23  | p = 0.276 |
|           |           |                 | SAP-Blank           | WT       | H <sub>2</sub> O  | Male | 9                     | 1.80 (0.05, 3.75)  |                  |                                                     |           |
|           |           |                 | CCK-SAP-Bi          | WT       | H <sub>2</sub> O  | Male | 9                     | 2.40 (0.85, 8.50)  |                  |                                                     |           |
|           |           |                 | SAP-Blank           | WT       | DSS               | Male | 12                    | 0.40 (0.15, 0.75)  | Two-way ANOVA    | DSS x Nodose CCK-SAP<br>F <sub>(1,36)</sub> = 1.85  | p = 0.182 |
|           |           |                 | CCK-SAP-R           | WT       | DSS               | Male | 10                    | 0.80 (0.38, 2.00)  |                  |                                                     |           |
|           |           |                 | SAP-Blank           | WT       | H <sub>2</sub> O  | Male | 9                     | 1.80 (0.05, 3.75)  |                  |                                                     |           |
|           |           |                 | CCK-SAP-Bi          | WT       | H <sub>2</sub> O  | Male | 9                     | 2.40 (0.85, 8.50)  |                  |                                                     |           |
| SAP-Blank | WT        | DSS             | Male                | 12       | 0.40 (0.15, 0.75) |      |                       |                    |                  |                                                     |           |
| CCK-SAP-L | WT        | DSS             | Male                | 10       | 0.15 (0.00, 2.80) |      |                       |                    |                  |                                                     |           |

| Figure | Parameter |                 | Test specifications | Genotype | Treatment        | Sex  | Number of individuals | Median (Q1,Q3)     | Statistical test                                   | Compared Groups                                     | p = value                 |
|--------|-----------|-----------------|---------------------|----------|------------------|------|-----------------------|--------------------|----------------------------------------------------|-----------------------------------------------------|---------------------------|
| Fig.4I | EPM       | open arms (sec) |                     |          |                  |      |                       |                    | Two-way ANOVA<br>Tukey's Multiple Comparisons test | H <sub>2</sub> O SAP-B vs. H <sub>2</sub> O CCK-SAP | p = 0.857                 |
|        |           |                 | SAP-Blank           | WT       | H <sub>2</sub> O | Male | 9                     | 1.80 (0.05, 3.75)  |                                                    | H <sub>2</sub> O SAP-B vs. DSS SAP-B                | p = 0.063                 |
|        |           |                 | CCK-SAP-Bi          | WT       | H <sub>2</sub> O | Male | 9                     | 2.40 (0.85, 8.50)  |                                                    | H <sub>2</sub> O SAP-B vs. DSS CCK-SAP              | p = 0.719                 |
|        |           |                 | SAP-Blank           | WT       | DSS              | Male | 12                    | 0.40 (0.15, 0.75)  |                                                    | H <sub>2</sub> O CCK-SAP vs. DSS SAP-B              | p = 0.319                 |
|        |           |                 | CCK-SAP             | WT       | DSS              | Male | 12                    | 8.15 (3.53, 12.68) |                                                    | H <sub>2</sub> O CCK-SAP vs. DSS CCK-SAP            | p = 0.245                 |
|        |           |                 |                     |          |                  |      |                       |                    |                                                    |                                                     | DSS SAP-B vs. DSS CCK-SAP |

| Figure | Parameter |                   | Test specifications | Genotype | Treatment        | Sex  | Number of individuals | Median (Q1,Q3)       | Statistical test                     | t-distribution t, df     | p = value |
|--------|-----------|-------------------|---------------------|----------|------------------|------|-----------------------|----------------------|--------------------------------------|--------------------------|-----------|
| Fig.4J | EPM       | closed arms (sec) | SAP-Blank           | WT       | H <sub>2</sub> O | Male | 9                     | 86.00 (77.15, 92.20) | Two-tailed unpaired Student's t-test | t <sub>(19)</sub> = 3.34 | p = 0.003 |
|        |           |                   | SAP-Blank           | WT       | DSS              | Male | 12                    | 93.05 (91.05, 94.73) |                                      |                          |           |

| Figure | Parameter |                   | Test specifications | Genotype | Treatment        | Sex              | Number of individuals | Median (Q1,Q3)       | Statistical test | Fixed effects F(DFn,DFd)                           | p = value                   |               |                                                     |           |
|--------|-----------|-------------------|---------------------|----------|------------------|------------------|-----------------------|----------------------|------------------|----------------------------------------------------|-----------------------------|---------------|-----------------------------------------------------|-----------|
| Fig.4J | EPM       | closed arms (sec) | SAP-Blank           | WT       | H <sub>2</sub> O | Male             | 9                     | 86.00 (77.15, 92.20) | Two-way ANOVA    | DSS x Nodose CCK-SAP<br>F <sub>(1,38)</sub> = 7.72 | p = 0.008                   |               |                                                     |           |
|        |           |                   | CCK-SAP-Bi          | WT       | H <sub>2</sub> O | Male             | 9                     | 77.20 (70.70, 86.25) |                  |                                                    |                             |               |                                                     |           |
|        |           |                   | SAP-Blank           | WT       | DSS              | Male             | 12                    | 93.05 (91.05, 94.73) |                  |                                                    |                             |               |                                                     |           |
|        |           |                   |                     |          |                  | <b>CCK-SAP</b>   | <b>WT</b>             | <b>DSS</b>           | <b>Male</b>      | <b>12</b>                                          | <b>78.45 (68.35, 85.48)</b> | Two-way ANOVA | DSS x Nodose CCK-SAP<br>F <sub>(1,36)</sub> = 0.001 | p = 0.974 |
|        |           |                   | SAP-Blank           | WT       | H <sub>2</sub> O | Male             | 9                     | 86.00 (77.15, 92.20) |                  |                                                    |                             |               |                                                     |           |
|        |           |                   | CCK-SAP-Bi          | WT       | H <sub>2</sub> O | Male             | 9                     | 77.20 (70.70, 86.25) |                  |                                                    |                             |               |                                                     |           |
|        |           |                   |                     |          |                  | SAP-Blank        | WT                    | DSS                  | Male             | 12                                                 | 93.05 (91.05, 94.73)        | Two-way ANOVA | DSS x Nodose CCK-SAP<br>F <sub>(1,36)</sub> = 0.002 | p = 0.962 |
|        |           |                   |                     |          |                  | <b>CCK-SAP-R</b> | <b>WT</b>             | <b>DSS</b>           | <b>Male</b>      | <b>10</b>                                          | <b>94.25 (89.20, 95.78)</b> |               |                                                     |           |
|        |           |                   |                     |          |                  | SAP-Blank        | WT                    | H <sub>2</sub> O     | Male             | 9                                                  | 86.00 (77.15, 92.20)        |               |                                                     |           |
|        |           |                   |                     |          |                  | CCK-SAP-Bi       | WT                    | H <sub>2</sub> O     | Male             | 9                                                  | 77.20 (70.70, 86.25)        | Two-way ANOVA | DSS x Nodose CCK-SAP<br>F <sub>(1,36)</sub> = 0.002 | p = 0.962 |
|        |           |                   |                     |          |                  | SAP-Blank        | WT                    | DSS                  | Male             | 12                                                 | 93.05 (91.05, 94.73)        |               |                                                     |           |
|        |           |                   |                     |          |                  | <b>CCK-SAP-L</b> | <b>WT</b>             | <b>DSS</b>           | <b>Male</b>      | <b>10</b>                                          | <b>96.05 (91.48, 98.38)</b> |               |                                                     |           |

| Figure | Parameter |                   | Test specifications | Genotype  | Treatment        | Sex         | Number of individuals | Median (Q1,Q3)              | Statistical test                                   | Compared Groups                                     | p = value                 |           |
|--------|-----------|-------------------|---------------------|-----------|------------------|-------------|-----------------------|-----------------------------|----------------------------------------------------|-----------------------------------------------------|---------------------------|-----------|
| Fig.4J | EPM       | closed arms (sec) |                     |           |                  |             |                       |                             | Two-way ANOVA<br>Tukey's Multiple Comparisons test | H <sub>2</sub> O SAP-B vs. H <sub>2</sub> O CCK-SAP | p > 0.999                 |           |
|        |           |                   | SAP-Blank           | WT        | H <sub>2</sub> O | Male        | 9                     | 86.00 (77.15, 92.20)        |                                                    | H <sub>2</sub> O SAP-B vs. DSS SAP-B                | p = 0.001                 |           |
|        |           |                   | CCK-SAP-Bi          | WT        | H <sub>2</sub> O | Male        | 9                     | 77.20 (70.70, 86.25)        |                                                    | H <sub>2</sub> O SAP-B vs. DSS CCK-SAP              | p = 0.940                 |           |
|        |           |                   | SAP-Blank           | WT        | DSS              | Male        | 12                    | 93.05 (91.05, 94.73)        |                                                    | H <sub>2</sub> O CCK-SAP vs. DSS SAP-B              | p = 0.011                 |           |
|        |           |                   | <b>CCK-SAP</b>      | <b>WT</b> | <b>DSS</b>       | <b>Male</b> | <b>12</b>             | <b>78.45 (68.35, 85.48)</b> |                                                    | H <sub>2</sub> O CCK-SAP vs. DSS CCK-SAP            | p = 0.933                 |           |
|        |           |                   |                     |           |                  |             |                       |                             |                                                    |                                                     | DSS SAP-B vs. DSS CCK-SAP | p < 0.001 |
|        |           |                   |                     |           |                  |             |                       |                             |                                                    |                                                     |                           |           |

| Figure | Parameter     | Brain region | Test specifications | Genotype | Treatment | Sex  | Number (sections) | Mean ± SEM   | Statistical test                     | t-distribution t, df     | p = value |
|--------|---------------|--------------|---------------------|----------|-----------|------|-------------------|--------------|--------------------------------------|--------------------------|-----------|
| Fig.5B | c-Fos neurons | NTS          | H <sub>2</sub> O    | WT       | -         | Male | 5 (37)            | 3.58 ± 0.48  | Two-tailed unpaired Student's t-test | t <sub>(8)</sub> = 8.89  | p < 0.001 |
|        |               |              | DSS                 | WT       | -         | Male | 5 (43)            | 13.02 ± 0.95 |                                      |                          |           |
| Fig.5D | c-Fos neurons | LC           | H <sub>2</sub> O    | WT       | -         | Male | 5 (21)            | 19.92 ± 2.10 | Two-tailed unpaired Student's t-test | t <sub>(8)</sub> = 11.83 | p < 0.001 |
|        |               |              | DSS                 | WT       | -         | Male | 5 (26)            | 61.14 ± 2.78 |                                      |                          |           |
| Fig.5F | c-Fos neurons | BLA          | H <sub>2</sub> O    | WT       | -         | Male | 5 (39)            | 9.16 ± 1.42  | Two-tailed unpaired Student's t-test | t <sub>(8)</sub> = 3.01  | p = 0.017 |
|        |               |              | DSS                 | WT       | -         | Male | 5 (35)            | 14.62 ± 1.13 |                                      |                          |           |

| Figure | Parameter |                      | Test specifications | Genotype | Treatment | Sex  | Number of individuals | Median (Q1,Q3)       | Statistical test                     | t-distribution t, df     | p = value |
|--------|-----------|----------------------|---------------------|----------|-----------|------|-----------------------|----------------------|--------------------------------------|--------------------------|-----------|
| Fig.7C | OFT       | total distance (m)   | Saline              | DBH-Cre  | DSS       | Male | 10                    | 22.65 (10.79, 28.70) | Two-tailed unpaired Student's t-test | t <sub>(18)</sub> = 0.45 | p = 0.656 |
|        |           |                      | CNO                 | DBH-Cre  | DSS       | Male | 10                    | 24.49 (20.90, 30.98) |                                      |                          |           |
| Fig.7D | OFT       | time in center (sec) | Saline              | DBH-Cre  | DSS       | Male | 10                    | 1.65 (0.35, 5.38)    | Two-tailed unpaired Student's t-test | t <sub>(18)</sub> = 3.34 | p = 0.004 |
|        |           |                      | CNO                 | DBH-Cre  | DSS       | Male | 10                    | 8.10 (7.00, 13.28)   |                                      |                          |           |

| Figure | Parameter |                    | Test specifications | Genotype | Treatment | Sex  | Number of individuals | Median (Q1,Q3)       | Statistical test                     | t-distribution t, df     | p = value |
|--------|-----------|--------------------|---------------------|----------|-----------|------|-----------------------|----------------------|--------------------------------------|--------------------------|-----------|
| Fig.7E | LDB       | duration (sec)     | Saline              | DBH-Cre  | DSS       | Male | 10                    | 29.00 (20.75, 46.50) | Two-tailed unpaired Student's t-test | t <sub>(18)</sub> = 3.09 | p = 0.006 |
|        |           |                    | CNO                 | DBH-Cre  | DSS       | Male | 10                    | 53.50 (44.00, 62.00) |                                      |                          |           |
| Fig.7F | LDB       | entries            | Saline              | DBH-Cre  | DSS       | Male | 10                    | 6.50 (5.00, 9.25)    | Two-tailed unpaired Student's t-test | t <sub>(18)</sub> = 3.25 | p = 0.004 |
|        |           |                    | CNO                 | DBH-Cre  | DSS       | Male | 10                    | 13.00 (8.50, 18.00)  |                                      |                          |           |
| Fig.7G | EPM       | total distance (m) | Saline              | DBH-Cre  | DSS       | Male | 10                    | 7.61 (6.73, 11.94)   | Two-tailed unpaired Student's t-test | t <sub>(18)</sub> = 2.12 | p = 0.04  |
|        |           |                    | CNO                 | DBH-Cre  | DSS       | Male | 10                    | 11.54 (8.48, 20.31)  |                                      |                          |           |
| Fig.7H | EPM       | open arms (sec)    | Saline              | DBH-Cre  | DSS       | Male | 10                    | 6.90 (0.73, 15.70)   | Two-tailed unpaired Student's t-test | t <sub>(18)</sub> = 2.78 | p = 0.012 |
|        |           |                    | CNO                 | DBH-Cre  | DSS       | Male | 10                    | 21.45 (9.63, 42.85)  |                                      |                          |           |

| Figure | Parameter |                   | Test specifications | Genotype | Treatment | Sex  | Number of individuals | Median (Q1,Q3)       | Statistical test                     | t-distribution t, df | p = value |
|--------|-----------|-------------------|---------------------|----------|-----------|------|-----------------------|----------------------|--------------------------------------|----------------------|-----------|
| Fig.7I | EPM       | closed arms (sec) | Saline              | DBH-Cre  | DSS       | Male | 10                    | 74.95 (53.73, 87.48) | Two-tailed unpaired Student's t-test | t(18) = 2.03         | p = 0.057 |
|        |           |                   | CNO                 | DBH-Cre  | DSS       | Male | 10                    | 53.95 (35.80, 81.05) |                                      |                      |           |

| Figure               | Parameter |                      | Test specifications | Genotype | Treatment | Sex  | Number of individuals | Median (Q1,Q3)      | Statistical test                     | t-distribution t, df     | p = value |
|----------------------|-----------|----------------------|---------------------|----------|-----------|------|-----------------------|---------------------|--------------------------------------|--------------------------|-----------|
| Supplementary Fig.1B | OF        | Number of rearings   | H <sub>2</sub> O    | WT       | -         | Male | 13                    | 44.0 (39.50, 61.00) | Two-tailed unpaired Student's t-test | t <sub>(23)</sub> = 6.66 | p < 0.001 |
|                      |           |                      | DSS                 | WT       | -         | Male | 12                    | 18.0 (10.75, 22.00) |                                      |                          |           |
| Supplementary Fig.1C | LDB       | Number of nose pokes | H <sub>2</sub> O    | WT       | -         | Male | 13                    | 5.0 (4.00, 7.00)    | Two-tailed unpaired Student's t-test | t <sub>(23)</sub> = 0.68 | p = 0.504 |
|                      |           |                      | DSS                 | WT       | -         | Male | 12                    | 4.0 (2.25, 6.75)    |                                      |                          |           |
| Supplementary Fig.1D | EPM       | Number of rearings   | H <sub>2</sub> O    | WT       | -         | Male | 13                    | 14.0 (10.50, 16.00) | Mann-Whitney U test                  | -                        | p < 0.001 |
|                      |           |                      | DSS                 | WT       | -         | Male | 12                    | 4.0 (1.25, 6.75)    |                                      |                          |           |
| Supplementary Fig.1E | EPM       | Number of stretches  | H <sub>2</sub> O    | WT       | -         | Male | 13                    | 9.0 (8.00, 12.00)   | Two-tailed unpaired Student's t-test | t <sub>(23)</sub> = 5.46 | p < 0.001 |
|                      |           |                      | DSS                 | WT       | -         | Male | 12                    | 3.5 (2.00, 5.75)    |                                      |                          |           |
| Supplementary Fig.1F | OF        | Number of rearings   | Sham                | WT       | DSS       | Male | 13                    | 7.0 (2.00, 11.50)   | Two-tailed unpaired Student's t-test | t <sub>(25)</sub> = 4.44 | p < 0.001 |
|                      |           |                      | GV-Bi               | WT       | DSS       | Male | 14                    | 21.5 (16.50, 29.25) |                                      |                          |           |
| Supplementary Fig.1G | LDB       | Number of nose pokes | Sham                | WT       | DSS       | Male | 13                    | 4.0 (2.00, 5.00)    | Two-tailed unpaired Student's t-test | t <sub>(25)</sub> = 0.24 | p = 0.811 |
|                      |           |                      | GV-Bi               | WT       | DSS       | Male | 14                    | 4.0 (3.00, 6.00)    |                                      |                          |           |
| Supplementary Fig.1H | EPM       | Number of rearings   | Sham                | WT       | DSS       | Male | 13                    | 2.0 (0.00, 4.50)    | Two-tailed unpaired Student's t-test | t <sub>(25)</sub> = 5.79 | p < 0.001 |
|                      |           |                      | GV-Bi               | WT       | DSS       | Male | 14                    | 13.5 (7.50, 16.50)  |                                      |                          |           |
| Supplementary Fig.1I | EPM       | Number of stretches  | Sham                | WT       | DSS       | Male | 13                    | 4.0 (1.00, 4.00)    | Two-tailed unpaired Student's t-test | t <sub>(25)</sub> = 4.47 | p < 0.001 |
|                      |           |                      | GV-Bi               | WT       | DSS       | Male | 14                    | 6.0 (5.00, 9.50)    |                                      |                          |           |
| Supplementary Fig.1J | OF        | Number of rearings   | SAP-Blank           | WT       | DSS       | Male | 12                    | 14.5 (5.50, 20.75)  | Two-tailed unpaired Student's t-test | t <sub>(22)</sub> = 2.95 | p < 0.001 |
|                      |           |                      | CCK-SAP             | WT       | DSS       | Male | 12                    | 26.0 (14.25, 39.25) |                                      |                          |           |
| Supplementary Fig.1K | LDB       | Number of nose pokes | SAP-Blank           | WT       | DSS       | Male | 12                    | 3.0 (0.25, 5.25)    | Two-tailed unpaired Student's t-test | t <sub>(22)</sub> = 0.31 | p = 0.760 |
|                      |           |                      | CCK-SAP             | WT       | DSS       | Male | 12                    | 2.5 (1.25, 5.75)    |                                      |                          |           |
| Supplementary Fig.1L | EPM       | Number of rearings   | SAP-Blank           | WT       | DSS       | Male | 12                    | 1.5 (1.00, 3.75)    | Two-tailed unpaired Student's t-test | t <sub>(22)</sub> = 4.30 | p < 0.001 |
|                      |           |                      | CCK-SAP             | WT       | DSS       | Male | 12                    | 8.0 (6.00, 13.00)   |                                      |                          |           |
| Supplementary Fig.1M | EPM       | Number of stretches  | SAP-Blank           | WT       | DSS       | Male | 12                    | 3.0 (2.00, 6.50)    | Two-tailed unpaired Student's t-test | t <sub>(22)</sub> = 5.14 | p < 0.001 |
|                      |           |                      | CCK-SAP             | WT       | DSS       | Male | 12                    | 9.5 (7.00, 14.25)   |                                      |                          |           |

| Figure               | Parameter                |                      | Test specifications | Genotype | Treatment | Sex  | Number of individuals | Mean ± SEM           | Statistical test                     | Fixed effects F(DFn,DFd)                  | p = value |
|----------------------|--------------------------|----------------------|---------------------|----------|-----------|------|-----------------------|----------------------|--------------------------------------|-------------------------------------------|-----------|
| Supplementary Fig.2B | Withdrawal threshold (g) |                      | H <sub>2</sub> O    | WT       | -         | Male | 10                    | -                    | Two-way RM ANOVA                     | Time x DSS<br>F <sub>(9,162)</sub> = 5.68 | p < 0.001 |
|                      |                          |                      | DSS                 | WT       | -         | Male | 10                    |                      |                                      |                                           |           |
| Figure               | Parameter                |                      | Test specifications | Genotype | Treatment | Sex  | Number of individuals | Median (Q1,Q3)       | Statistical test                     | t-distribution t, df                      | p = value |
| Supplementary Fig.2C | NSF                      | Latency to eat (sec) | H <sub>2</sub> O    | WT       | -         | Male | 10                    | 134.5 (99.50, 239.3) | Two-tailed unpaired Student's t-test | t <sub>(18)</sub> = 2.12                  | p = 0.048 |
|                      |                          |                      | DSS                 | WT       | -         | Male | 10                    | 240.5 (173.5, 357.8) |                                      |                                           |           |
| Supplementary Fig.2D | HCA                      | total distance (m)   | H <sub>2</sub> O    | WT       | -         | Male | 10                    | 25.65 (20.93, 29.98) | Two-tailed unpaired Student's t-test | t <sub>(18)</sub> = 1.78                  | p = 0.093 |
|                      |                          |                      | DSS                 | WT       | -         | Male | 10                    | 18.90 (14.38, 25.00) |                                      |                                           |           |
| Figure               | Parameter                |                      | Test specifications | Genotype | Treatment | Sex  | Number of individuals | Mean ± SEM           | Statistical test                     | Fixed effects F(DFn,DFd)                  | p = value |
| Supplementary Fig.2E | Withdrawal threshold (g) |                      | Sham                | WT       | DSS       | Male | 9                     | -                    | Two-way RM ANOVA                     | Time x DSS<br>F <sub>(9,144)</sub> = 1.06 | p = 0.393 |
|                      |                          |                      | GV                  | WT       | DSS       | Male | 9                     |                      |                                      |                                           |           |
| Figure               | Parameter                |                      | Test specifications | Genotype | Treatment | Sex  | Number of individuals | Median (Q1,Q3)       | Statistical test                     | t-distribution t, df                      | p = value |
| Supplementary Fig.2F | NSF                      | Latency to eat (sec) | Sham                | WT       | DSS       | Male | 9                     | 197.0 (144.0, 371.5) | Mann-Whitney U test                  | -                                         | p = 0.006 |
|                      |                          |                      | GV                  | WT       | DSS       | Male | 9                     | 117.0 (100.5, 138.0) |                                      |                                           |           |
| Supplementary Fig.2G | HCA                      | total distance (m)   | Sham                | WT       | DSS       | Male | 9                     | 13.50 (8.95, 16.50)  | Two-tailed unpaired Student's t-test | t <sub>(16)</sub> = 0.18                  | p = 0.860 |
|                      |                          |                      | GV                  | WT       | DSS       | Male | 9                     | 11.50 (8.50, 17.70)  |                                      |                                           |           |



| Figure               | Parameter                |                      | Test specifications | Genotype | Treatment | Sex  | Number of individuals | Mean ± SEM           | Statistical test                     | Fixed effects F(DFn,DFd)                 | p = value |
|----------------------|--------------------------|----------------------|---------------------|----------|-----------|------|-----------------------|----------------------|--------------------------------------|------------------------------------------|-----------|
| Supplementary Fig.2H | Withdrawal threshold (g) |                      | SAP-Blank           | WT       | DSS       | Male | 5                     | -                    | Two-way RM ANOVA                     | Time x DSS<br>F <sub>(9,72)</sub> = 0.62 | p = 0.777 |
|                      |                          |                      | CCK-SAP             | WT       | DSS       | Male | 5                     |                      |                                      |                                          |           |
| Figure               | Parameter                |                      | Test specifications | Genotype | Treatment | Sex  | Number of individuals | Median (Q1,Q3)       | Statistical test                     | t-distribution t, df                     | p = value |
| Supplementary Fig.2I | NSF                      | Latency to eat (sec) | SAP-Blank           | WT       | DSS       | Male | 5                     | 166.0 (149.5, 499.0) | Two-tailed unpaired Student's t-test | t <sub>(18)</sub> = 2.19                 | p = 0.059 |
|                      |                          |                      | CCK-SAP             | WT       | DSS       | Male | 5                     | 103.0 (88.00, 120.0) |                                      |                                          |           |
| Supplementary Fig.2J | HCA                      | total distance (m)   | SAP-Blank           | WT       | DSS       | Male | 5                     | 11.30 (8.75, 15.90)  | Two-tailed unpaired Student's t-test | t <sub>(18)</sub> = 0.42                 | p = 0.683 |

| Figure               | Parameter              |  | Test specifications | Genotype | Treatment | Sex  | Number of individuals | Mean ± SEM   | Statistical test                   | Fixed effects F(DFn,DFd)                   | p = value |
|----------------------|------------------------|--|---------------------|----------|-----------|------|-----------------------|--------------|------------------------------------|--------------------------------------------|-----------|
| Supplementary Fig.3B | Body weight            |  | Sham                | WT       | DSS       | Male | 9                     | -            | Two-way RM ANOVA                   | Time x DSS<br>F <sub>(14,168)</sub> = 2.05 | p = 0.017 |
|                      |                        |  | GV                  | WT       | DSS       | Male | 9                     |              |                                    |                                            |           |
|                      |                        |  | SDV                 | WT       | DSS       | Male | 9                     |              |                                    |                                            |           |
| Figure               | Parameter              |  | Test specifications | Genotype | Treatment | Sex  | Number of individuals | Mean ± SEM   | Statistical test                   | Compared Groups                            | p = value |
| Supplementary Fig.3B | Body weight            |  | Sham                | WT       | DSS       | Male | 9                     | -            | Tukey's Multiple Comparisons test  | Sham DSS vs. GV DSS                        | p = 0.113 |
|                      |                        |  | GV                  | WT       | DSS       | Male | 9                     |              |                                    | Sham DSS vs. SDV DSS                       | p = 0.547 |
|                      |                        |  | SDV                 | WT       | DSS       | Male | 9                     |              |                                    | GV DSS vs. SDV DSS                         | p = 0.642 |
| Figure               | Parameter              |  | Test specifications | Genotype | Treatment | Sex  | Number of individuals | Mean ± SEM   | Statistical test                   | Tukey's Multiple Comparisons               | p = value |
| Supplementary Fig.3D | Colon length (cm)      |  | Sham                | WT       | DSS       | Male | 9                     | 5.90 ± 0.25  | One-way ANOVA<br>(p < 0.001)       | Sham DSS vs. GV DSS                        | p = 0.026 |
|                      |                        |  | GV                  | WT       | DSS       | Male | 9                     | 5.17 ± 0.13  |                                    | Sham DSS vs. SDV DSS                       | p < 0.001 |
|                      |                        |  | SDV                 | WT       | DSS       | Male | 9                     | 4.48 ± 0.15  |                                    | GV DSS vs. SDV DSS                         | p = 0.038 |
| Figure               | Parameter              |  | Test specifications | Genotype | Treatment | Sex  | Number of individuals | Mean ± SEM   | Statistical test                   | Tukey's Multiple Comparisons               | p = value |
| Supplementary Fig.3E | Intestine length (cm)  |  | Sham                | WT       | DSS       | Male | 9                     | 38.44 ± 0.77 | One-way ANOVA<br>(p < 0.001)       | Sham DSS vs. GV DSS                        | p = 0.740 |
|                      |                        |  | GV                  | WT       | DSS       | Male | 9                     | 36.82 ± 0.80 |                                    | Sham DSS vs. SDV DSS                       | p < 0.001 |
|                      |                        |  | SDV                 | WT       | DSS       | Male | 9                     | 27.63 ± 2.43 |                                    | GV DSS vs. SDV DSS                         | p < 0.001 |
| Supplementary Fig.3F | Histological score     |  | Sham                | WT       | DSS       | Male | 4                     | 5.00 ± 0.41  | Kruskal-Wallis test<br>(p = 0.430) | -                                          | -         |
|                      |                        |  | GV                  | WT       | DSS       | Male | 4                     | 5.50 ± 0.50  |                                    |                                            |           |
|                      |                        |  | SDV                 | WT       | DSS       | Male | 4                     | 5.75 ± 0.25  |                                    |                                            |           |
| Supplementary Fig.3G | Spleen weight (g)      |  | Sham                | WT       | DSS       | Male | 9                     | 0.15 ± 0.05  | Kruskal-Wallis test<br>(p = 0.059) | -                                          | -         |
|                      |                        |  | GV                  | WT       | DSS       | Male | 9                     | 0.19 ± 0.09  |                                    |                                            |           |
|                      |                        |  | SDV                 | WT       | DSS       | Male | 9                     | 0.16 ± 0.01  |                                    |                                            |           |
| Figure               | Parameter              |  | Test specifications | Genotype | Treatment | Sex  | Number of individuals | Mean ± SEM   | Statistical test                   | Tukey's Multiple Comparisons               | p = value |
| Supplementary Fig.3H | FITC-Dextran (ng/ml)   |  | Sham                | WT       | DSS       | Male | 9                     | 2.78 ± 0.51  | Kruskal-Wallis test<br>(p = 0.004) | Sham DSS vs. GV DSS                        | p > 0.999 |
|                      |                        |  | GV                  | WT       | DSS       | Male | 9                     | 2.00 ± 0.28  |                                    | Sham DSS vs. SDV DSS                       | p = 0.047 |
|                      |                        |  | SDV                 | WT       | DSS       | Male | 9                     | 21.33 ± 6.29 |                                    | GV DSS vs. SDV DSS                         | p = 0.004 |
| Figure               | Parameter              |  | Test specifications | Genotype | Treatment | Sex  | Number of individuals | Mean ± SEM   | Statistical test                   | Fixed effects F(DFn,DFd)                   | p = value |
| Supplementary Fig.3I | Disease activity index |  | Sham                | WT       | DSS       | Male | 9                     | -            | Two-way RM ANOVA<br>(p < 0.001)    | Time x DSS<br>F <sub>(18,216)</sub> = 3.96 | p = 0.017 |
|                      |                        |  | GV                  | WT       | DSS       | Male | 9                     |              |                                    |                                            |           |
|                      |                        |  | SDV                 | WT       | DSS       | Male | 9                     |              |                                    |                                            |           |
| Figure               | Parameter              |  | Test specifications | Genotype | Treatment | Sex  | Number of individuals | Mean ± SEM   | Statistical test                   | Compared Groups                            | p = value |
| Supplementary Fig.3I | Disease activity index |  | Sham                | WT       | DSS       | Male | 9                     | -            | Tukey's Multiple Comparisons test  | Sham DSS vs. GV DSS                        | p = 0.331 |
|                      |                        |  | GV                  | WT       | DSS       | Male | 9                     |              |                                    | Sham DSS vs. SDV DSS                       | p = 0.479 |
|                      |                        |  | SDV                 | WT       | DSS       | Male | 9                     |              |                                    | GV DSS vs. SDV DSS                         | p = 0.989 |

| Figure               | Parameter     | Brain region | Test specifications | Genotype | Treatment | Sex  | Number (sections) | Mean ± SEM   | Statistical test                     | t-distribution t, df    | p = value |
|----------------------|---------------|--------------|---------------------|----------|-----------|------|-------------------|--------------|--------------------------------------|-------------------------|-----------|
| Supplementary Fig.4D | c-Fos neurons | NTS          | B-SAP               | WT       | -         | Male | 5 (26)            | 33.70 ± 1.12 | Two-tailed unpaired Student's t-test | t <sub>(8)</sub> = 4.60 | p = 0.002 |
|                      |               |              | CCK-SAP             | WT       | -         | Male | 5 (21)            | 23.36 ± 1.95 |                                      |                         |           |

| Figure               | Parameter               | Brain region    | Test specifications | Genotype | Treatment | Sex  | Number (sections) | Mean ± SEM   | Statistical test                     | t-distribution t, df    | p = value |
|----------------------|-------------------------|-----------------|---------------------|----------|-----------|------|-------------------|--------------|--------------------------------------|-------------------------|-----------|
| Supplementary Fig.4G | FG <sup>+</sup> neurons | Nodose Ganglion | B-SAP               | WT       | -         | Male | 5                 | 9.63 ± 0.68  | Two-tailed unpaired Student's t-test | t <sub>(8)</sub> = 4.66 | p = 0.002 |
|                      |                         |                 | CCK-SAP             | WT       | -         | Male | 5                 | 6.75 ± 0.65  |                                      |                         |           |
| Supplementary Fig.4J | FG <sup>+</sup> neurons | DMV             | B-SAP               | WT       | -         | Male | 5 (24)            | 38.52 ± 3.83 | Two-tailed unpaired Student's t-test | t <sub>(8)</sub> = 0.28 | p = 0.785 |
|                      |                         |                 | CCK-SAP             | WT       | -         | Male | 5 (21)            | 36.46 ± 6.19 |                                      |                         |           |

| Figure               | Parameter              | Test specifications | Genotype | Treatment | Sex  | Number of individuals | Mean ± SEM   | Statistical test                     | Fixed effects F(DFn,DFd)                 | p = value |
|----------------------|------------------------|---------------------|----------|-----------|------|-----------------------|--------------|--------------------------------------|------------------------------------------|-----------|
| Supplementary Fig.5B | Body weight            | SAP-Blank           | WT       | DSS       | Male | 5                     | -            | Two-way RM ANOVA                     | Time x DSS<br>F <sub>(7,56)</sub> = 0.91 | p = 0.504 |
|                      |                        | CCK-SAP             | WT       | DSS       | Male | 5                     |              |                                      |                                          |           |
| Figure               | Parameter              | Test specifications | Genotype | Treatment | Sex  | Number of individuals | Mean ± SEM   | Statistical test                     | t-distribution t, df                     | p = value |
| Supplementary Fig.5D | Colon length (cm)      | SAP-Blank           | WT       | DSS       | Male | 5                     | 5.10 ± 0.29  | Two-tailed unpaired Student's t-test | t <sub>(8)</sub> = 0.30                  | p = 0.771 |
|                      |                        | CCK-SAP             | WT       | DSS       | Male | 5                     | 4.98 ± 0.27  |                                      |                                          |           |
| Supplementary Fig.5E | Intestine length (cm)  | SAP-Blank           | WT       | DSS       | Male | 5                     | 34.14 ± 0.72 | Two-tailed unpaired Student's t-test | t <sub>(8)</sub> = 1.01                  | p = 0.342 |
|                      |                        | CCK-SAP             | WT       | DSS       | Male | 5                     | 33.26 ± 0.49 |                                      |                                          |           |
| Supplementary Fig.5F | Spleen weight (g)      | SAP-Blank           | WT       | DSS       | Male | 5                     | 0.14 ± 0.02  | Two-tailed unpaired Student's t-test | t <sub>(8)</sub> = 0.39                  | p = 0.709 |
|                      |                        | CCK-SAP             | WT       | DSS       | Male | 5                     | 0.13 ± 0.02  |                                      |                                          |           |
| Supplementary Fig.5H | Histological score     | SAP-Blank           | WT       | DSS       | Male | 5                     | 4.40 ± 0.51  | Two-tailed unpaired Student's t-test | t <sub>(8)</sub> = 0.52                  | p = 0.620 |
|                      |                        | CCK-SAP             | WT       | DSS       | Male | 5                     | 4.80 ± 0.58  |                                      |                                          |           |
| Supplementary Fig.5I | FITC-Dextran (ng/ml)   | SAP-Blank           | WT       | DSS       | Male | 5                     | 17.04 ± 4.11 | Two-tailed unpaired Student's t-test | t <sub>(8)</sub> = 0.08                  | p = 0.935 |
|                      |                        | CCK-SAP             | WT       | DSS       | Male | 5                     | 17.56 ± 4.58 |                                      |                                          |           |
| Figure               | Parameter              | Test specifications | Genotype | Treatment | Sex  | Number of individuals | Mean ± SEM   | Statistical test                     | Fixed effects F(DFn,DFd)                 | p = value |
| Supplementary Fig.5J | Disease activity index | SAP-Blank           | WT       | DSS       | Male | 5                     | -            | Two-way RM ANOVA                     | Time x DSS<br>F <sub>(9,72)</sub> = 0.55 | p = 0.833 |
|                      |                        | CCK-SAP             | WT       | DSS       | Male | 5                     |              |                                      |                                          |           |

| Figure               | Parameter     | Brain region | Test specifications | Genotype | Treatment | Sex  | Number (sections) | Mean ± SEM   | Statistical test                     | t-distribution t, df    | p = value |
|----------------------|---------------|--------------|---------------------|----------|-----------|------|-------------------|--------------|--------------------------------------|-------------------------|-----------|
| Supplementary Fig.6B | c-Fos neurons | NTS          | Sham                | WT       | DSS       | Male | 5 (31)            | 31.06 ± 3.15 | Two-tailed unpaired Student's t-test | t <sub>(8)</sub> = 3.35 | p = 0.01  |
|                      |               |              | GV                  | WT       | DSS       | Male | 5 (27)            | 18.46 ± 2.05 |                                      |                         |           |
| Supplementary Fig.6D | c-Fos neurons | LC           | Sham                | WT       | DSS       | Male | 5 (15)            | 48.30 ± 5.01 | Mann-Whitney U test                  | -                       | p = 0.016 |
|                      |               |              | GV                  | WT       | DSS       | Male | 5 (17)            | 15.00 ± 7.47 |                                      |                         |           |
| Supplementary Fig.6F | c-Fos neurons | BLA          | Sham                | WT       | DSS       | Male | 5 (36)            | 16.66 ± 1.10 | Two-tailed unpaired Student's t-test | t <sub>(8)</sub> = 5.37 | p < 0.001 |
|                      |               |              | GV                  | WT       | DSS       | Male | 5 (38)            | 8.68 ± 1.00  |                                      |                         |           |

| Figure               | Parameter     | Brain region | Test specifications | Genotype | Treatment | Sex  | Number (sections) | Mean ± SEM   | Statistical test                     | t-distribution t, df    | p = value |
|----------------------|---------------|--------------|---------------------|----------|-----------|------|-------------------|--------------|--------------------------------------|-------------------------|-----------|
| Supplementary Fig.7B | c-Fos neurons | NTS          | B-SAP               | WT       | DSS       | Male | 4 (24)            | 33.38 ± 6.02 | Mann-Whitney U test                  | -                       | p = 0.03  |
|                      |               |              | CCK-SAP             | WT       | DSS       | Male | 4 (24)            | 15.73 ± 1.61 |                                      |                         |           |
| Supplementary Fig.7D | c-Fos neurons | LC           | B-SAP               | WT       | DSS       | Male | 4 (13)            | 44.70 ± 5.59 | Two-tailed unpaired Student's t-test | t <sub>(6)</sub> = 2.87 | p = 0.03  |
|                      |               |              | CCK-SAP             | WT       | DSS       | Male | 4 (14)            | 26.85 ± 2.73 |                                      |                         |           |
| Supplementary Fig.7F | c-Fos neurons | BLA          | B-SAP               | WT       | DSS       | Male | 4 (28)            | 9.63 ± 0.68  | Two-tailed unpaired Student's t-test | t <sub>(6)</sub> = 3.06 | p = 0.02  |
|                      |               |              | CCK-SAP             | WT       | DSS       | Male | 4 (29)            | 6.75 ± 0.65  |                                      |                         |           |

| Figure               | Parameter                                                             | Brain region | Test specifications | Genotype | Treatment        | Sex  | Number | Mean ± SEM   | Statistical test | Fixed effects F(DFn,DFd)                           | p = value |
|----------------------|-----------------------------------------------------------------------|--------------|---------------------|----------|------------------|------|--------|--------------|------------------|----------------------------------------------------|-----------|
| Supplementary Fig.8B | FG <sup>+</sup> mCh <sup>+</sup> NET <sup>+</sup> of NET <sup>+</sup> | LC           | Right               | WT       | H <sub>2</sub> O | Male | 5      | 11.00 ± 2.11 | Two-way ANOVA    | DSS x Right and Left<br>F <sub>(1,12)</sub> = 0.04 | p = 0.841 |
|                      |                                                                       |              | Left                | WT       | H <sub>2</sub> O | Male | 5      | 14.68 ± 3.82 |                  |                                                    |           |
|                      |                                                                       |              | Right               | WT       | DSS              | Male | 5      | 13.08 ± 2.29 |                  |                                                    |           |
|                      |                                                                       |              | Left                | WT       | DSS              | Male | 5      | 15.70 ± 1.33 |                  |                                                    |           |

| Figure               | Parameter              | Test specifications | Genotype | Treatment | Sex  | Number of individuals | Mean ± SEM  | Statistical test                     | Fixed effects F(DFn,DFd)                  | p = value |
|----------------------|------------------------|---------------------|----------|-----------|------|-----------------------|-------------|--------------------------------------|-------------------------------------------|-----------|
| Supplementary Fig.9B | Disease activity index | Saline              | DBH-Cre  | DSS       | Male | 8                     | -           | Two-way RM ANOVA                     | Time x DSS<br>F <sub>(9,126)</sub> = 0.93 | p = 0.501 |
|                      |                        | CNO                 | DBH-Cre  | DSS       | Male | 8                     |             |                                      |                                           |           |
| Figure               | Parameter              | Test specifications | Genotype | Treatment | Sex  | Number of individuals | Mean ± SEM  | Statistical test                     | t-distribution t, df                      | p = value |
| Supplementary Fig.9C | Colon length (cm)      | Saline              | DBH-Cre  | DSS       | Male | 8                     | 5.46 ± 0.13 | Two-tailed unpaired Student's t-test | t <sub>(14)</sub> = 1.44                  | p = 0.172 |
|                      |                        | CNO                 | DBH-Cre  | DSS       | Male | 8                     | 5.18 ± 0.15 |                                      |                                           |           |
| Supplementary Fig.9D | Spleen weight (g)      | Saline              | DBH-Cre  | DSS       | Male | 8                     | 0.01 ± 0.01 | Two-tailed unpaired Student's t-test | t <sub>(14)</sub> = 0.39                  | p = 0.701 |
|                      |                        | CNO                 | DBH-Cre  | DSS       | Male | 8                     | 0.09 ± 0.01 |                                      |                                           |           |
| Supplementary Fig.9F | Histological score     | Saline              | DBH-Cre  | DSS       | Male | 4                     | 5.00 ± 0.41 | Mann-Whitney U test                  | -                                         | p = 0.371 |
|                      |                        | CNO                 |          |           |      | 4                     | 5.75 ± 0.25 |                                      |                                           |           |

| Figure                | Parameter     | Brain region | Test specifications | Genotype | Treatment | Sex  | Number (sections) | Mean ± SEM   | Statistical test                     | t-distribution t, df    | p = value |
|-----------------------|---------------|--------------|---------------------|----------|-----------|------|-------------------|--------------|--------------------------------------|-------------------------|-----------|
| Supplementary Fig.10B | c-Fos neurons | LC           | Saline              | DBH-Cre  | DSS       | Male | 5 (9)             | 74.76 ± 4.47 | Two-tailed unpaired Student's t-test | t <sub>(8)</sub> = 4.56 | p = 0.002 |
|                       |               |              | CNO                 | DBH-Cre  | DSS       | Male | 5 (9)             | 43.36 ± 5.25 |                                      |                         |           |
| Supplementary Fig.10D | c-Fos neurons | NTS          | Saline              | DBH-Cre  | DSS       | Male | 5 (14)            | 30.20 ± 2.83 | Two-tailed unpaired Student's t-test | t <sub>(8)</sub> = 0.41 | p = 0.696 |
|                       |               |              | CNO                 | DBH-Cre  | DSS       | Male | 5 (13)            | 32.00 ± 3.41 |                                      |                         |           |
